# Supplementary material for: Rapid, room-temperature self-organization of polyarylated 1H-pyrroles from acetylenes and nitriles in the KOBut/DMSO system
Source: Royal Society of Chemistry journal article supplement (doi:10.1039/d3ob01311a), 2023-01-01
Supplement: d3ob01311a1.pdf [file d3ob01311a1.pdf]

## Supporting information

### **Rapid, room-temperature self-organization of polyarylated 1*H*-pyrroles from acetylenes and nitriles in the KOBu<sup>t</sup>/DMSO system**

Elena Yu. Schmidt<sup>a</sup>, Inna V. Tatarinova<sup>a</sup>, Natal'ya A. Lobanova<sup>a</sup>, Igor A. Ushakov<sup>a</sup>, Irina Yu. Bagryanskaya<sup>b</sup> and Boris A. Trofimov<sup>a\*</sup>

<sup>a</sup>*A. E. Favorsky Irkutsk Institute of Chemistry, Siberian Branch, Russian Academy of Sciences, 1 Favorsky Str., 664033 Irkutsk, Russia*

<sup>b</sup>*N. N. Vorozhtsov Novosibirsk Institute of Organic Chemistry, Siberian Branch of the Russian Academy of Sciences, Novosibirsk 630090, Russia*

*E-mail: boris\_trofimov@irioc.irk.ru*

### **Table of Contents**

|    |                            |     |
|----|----------------------------|-----|
| 1. | NMR spectra                | S2  |
| 2. | X-ray diffraction analysis | S30 |
| 3. | References                 | S31 |

# 1. NMR spectra

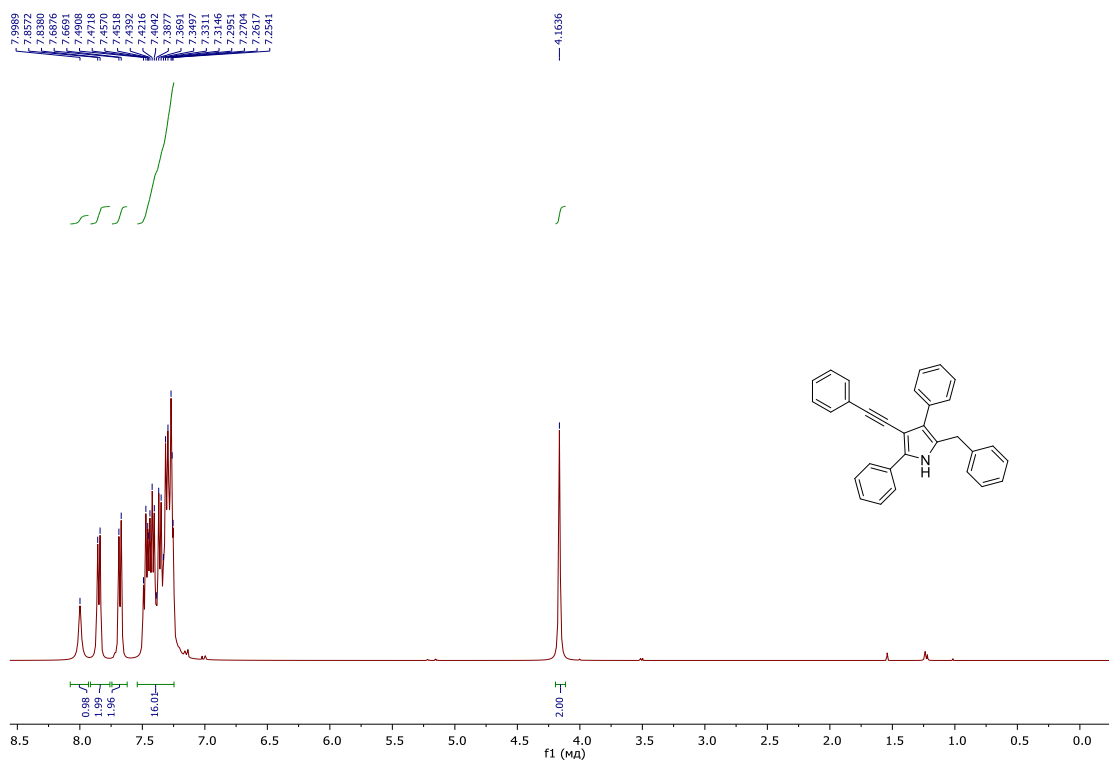

<sup>1</sup>H NMR Spectrum of **3aa** (400.1 MHz, CDCl<sub>3</sub>)

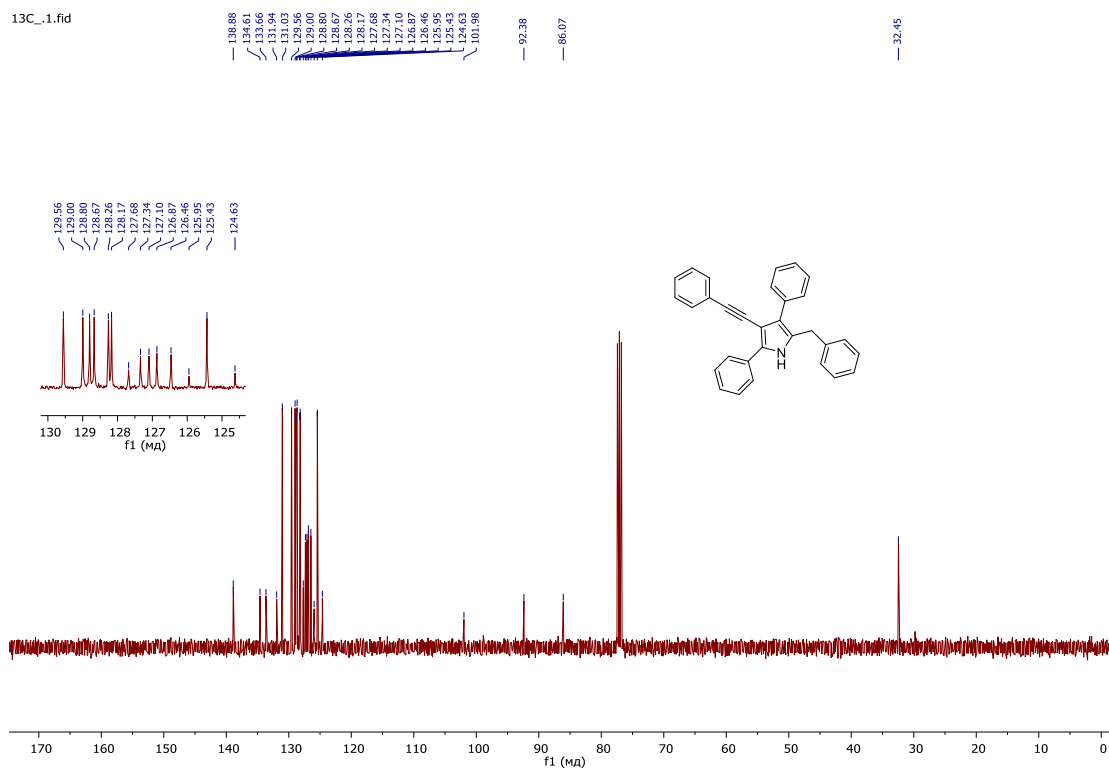

<sup>13</sup>C NMR Spectrum of **3aa** (100.6 MHz, CDCl<sub>3</sub>)



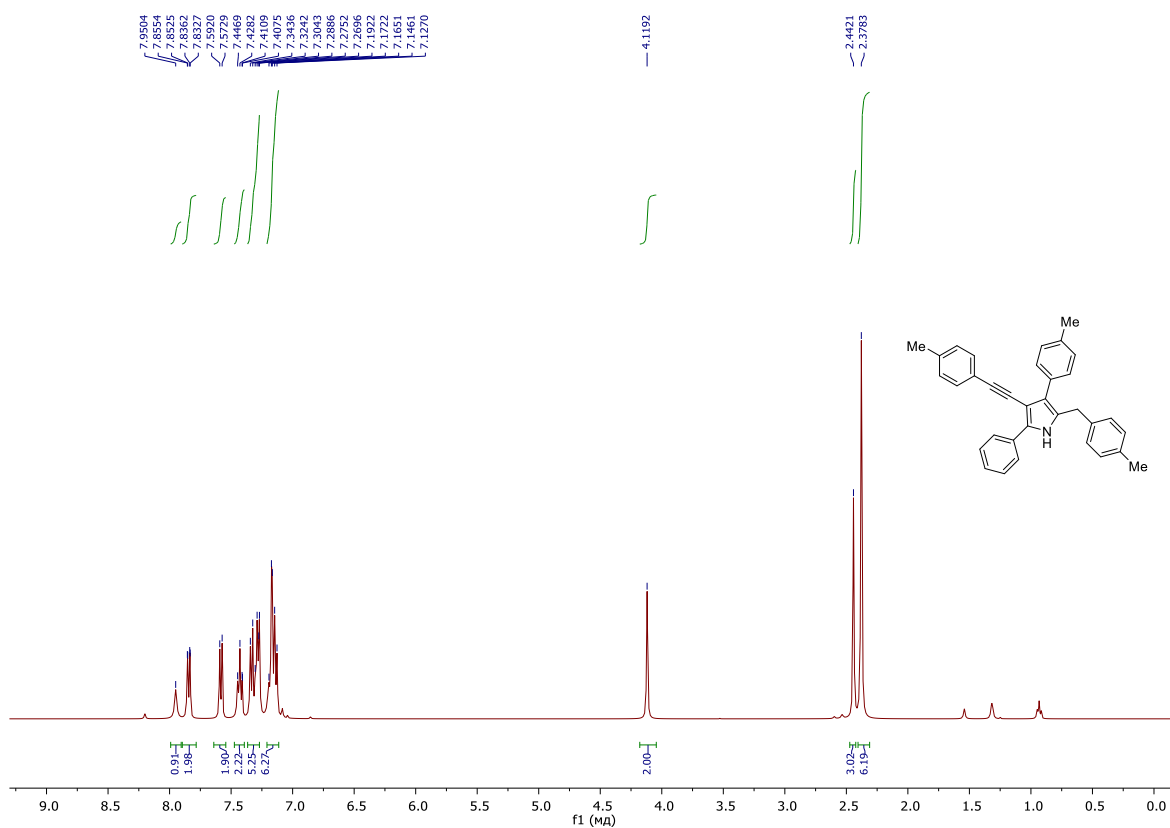

<sup>1</sup>H NMR Spectrum of **3ca** (400.1 MHz, CDCl<sub>3</sub>)

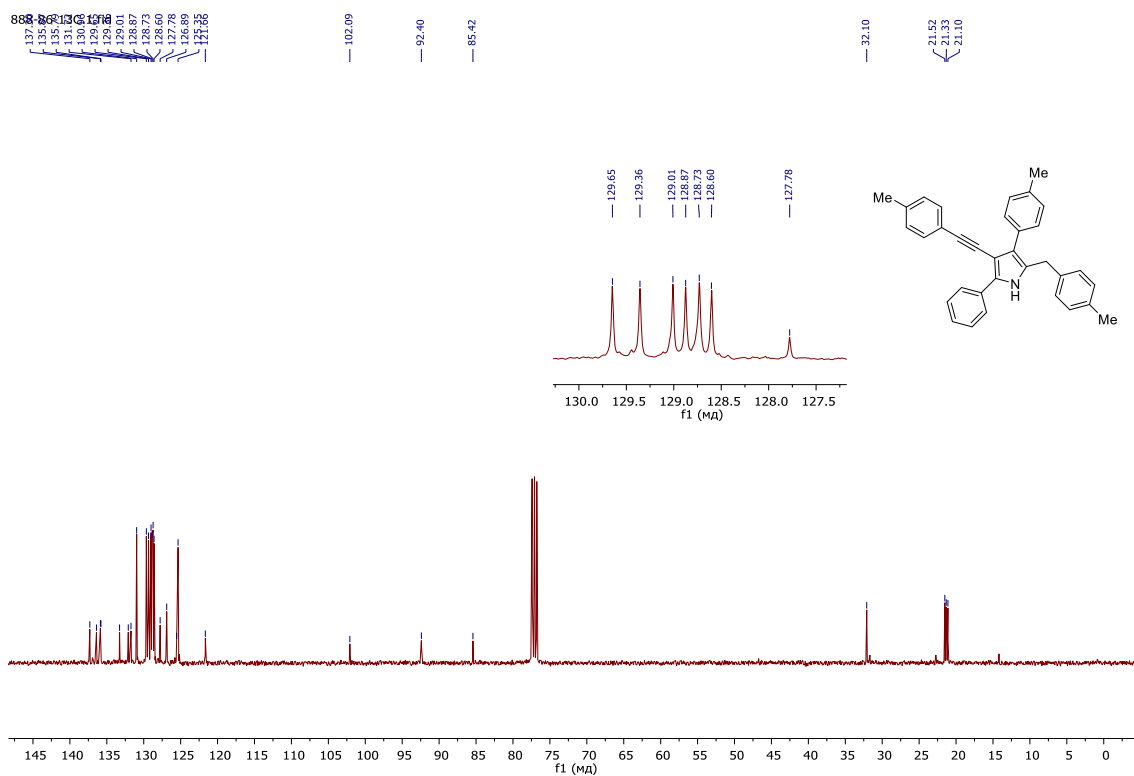

<sup>13</sup>C NMR Spectrum of **3ca** (100.6 MHz, CDCl<sub>3</sub>)

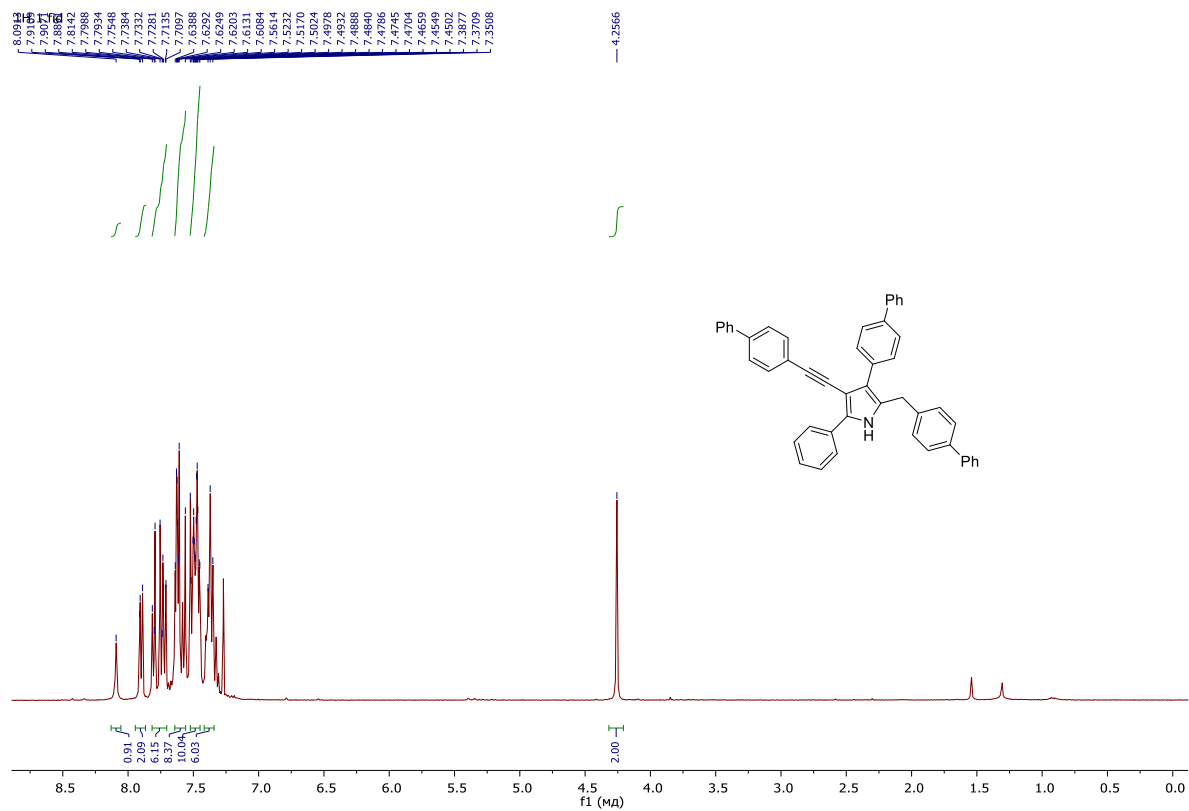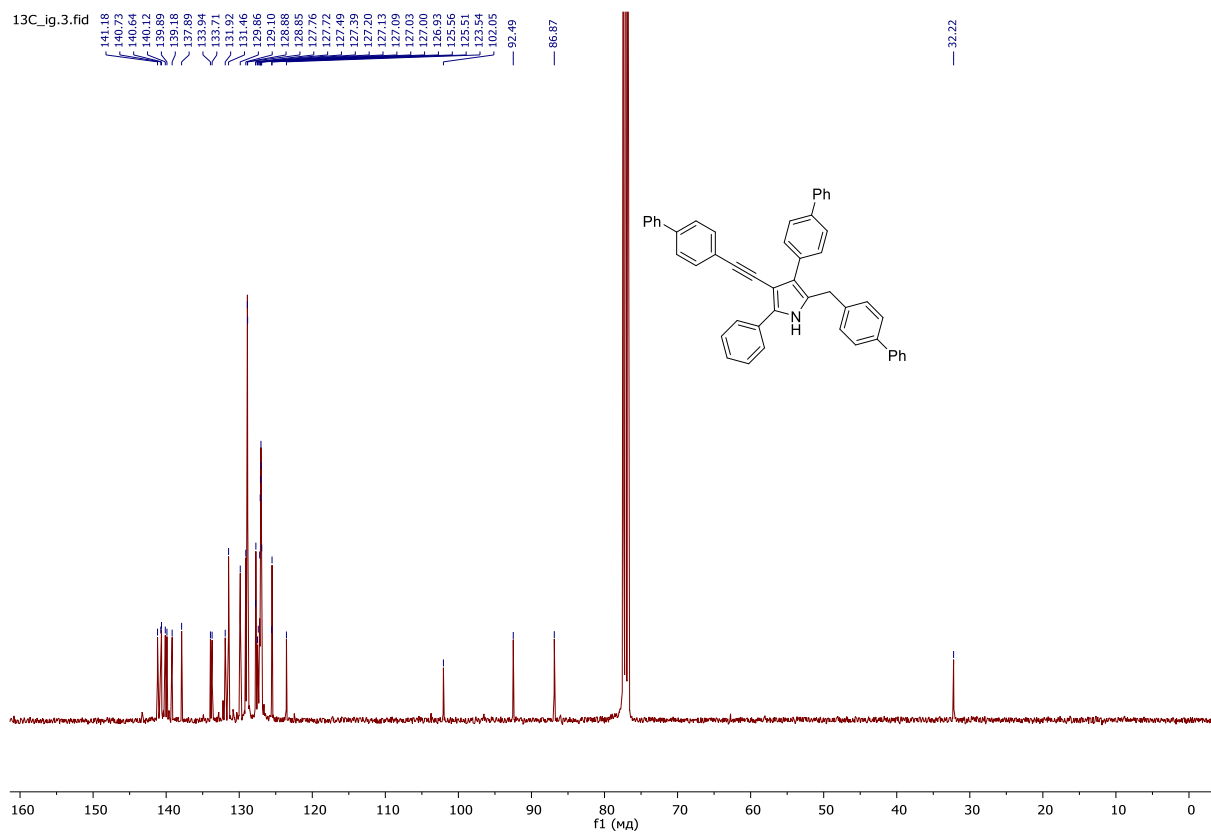

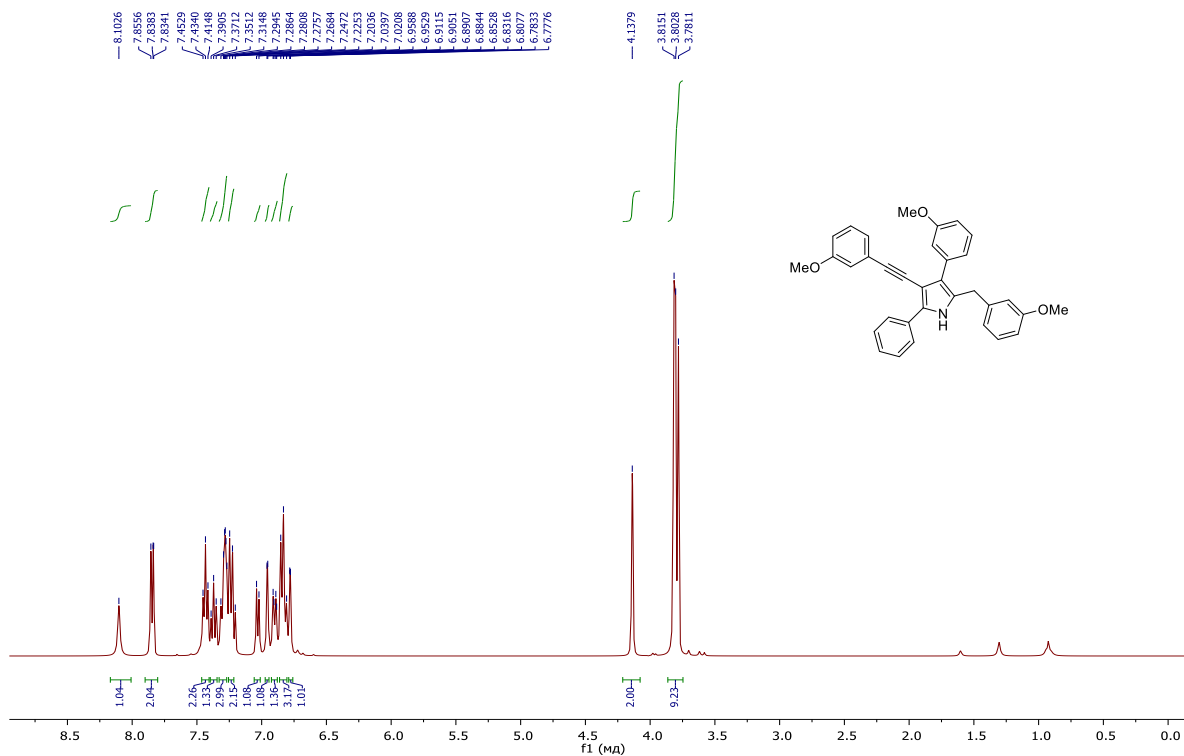

**<sup>1</sup>H NMR Spectrum of 3ea (400.1 MHz, CDCl<sub>3</sub>)**

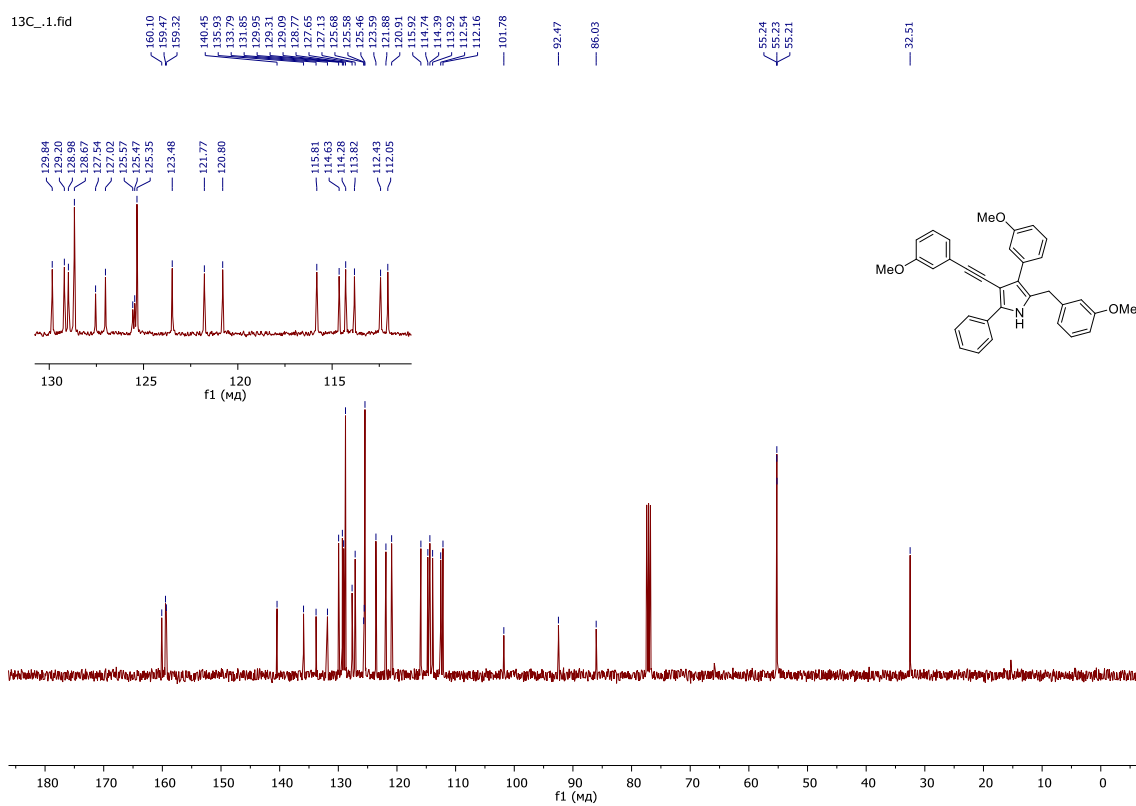

**<sup>13</sup>C NMR Spectrum of 3ea (100.6 MHz, CDCl<sub>3</sub>)**

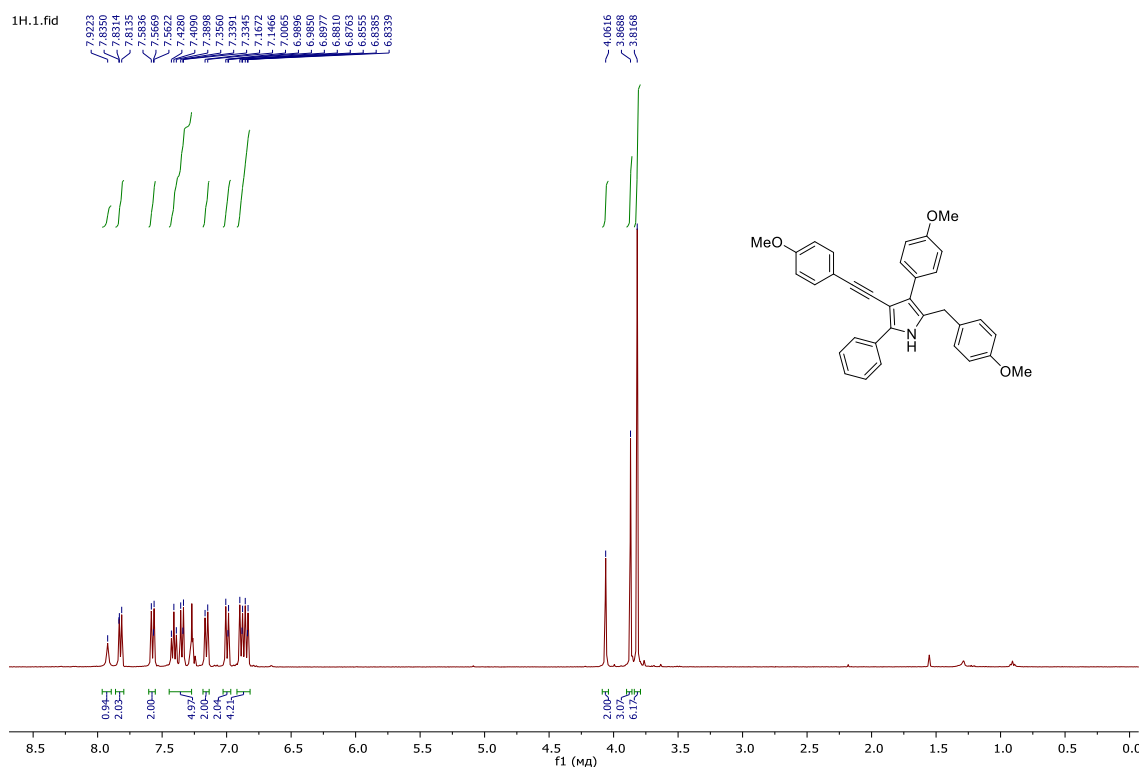

<sup>1</sup>H NMR Spectrum of **3fa** (400.1 MHz, CDCl<sub>3</sub>)

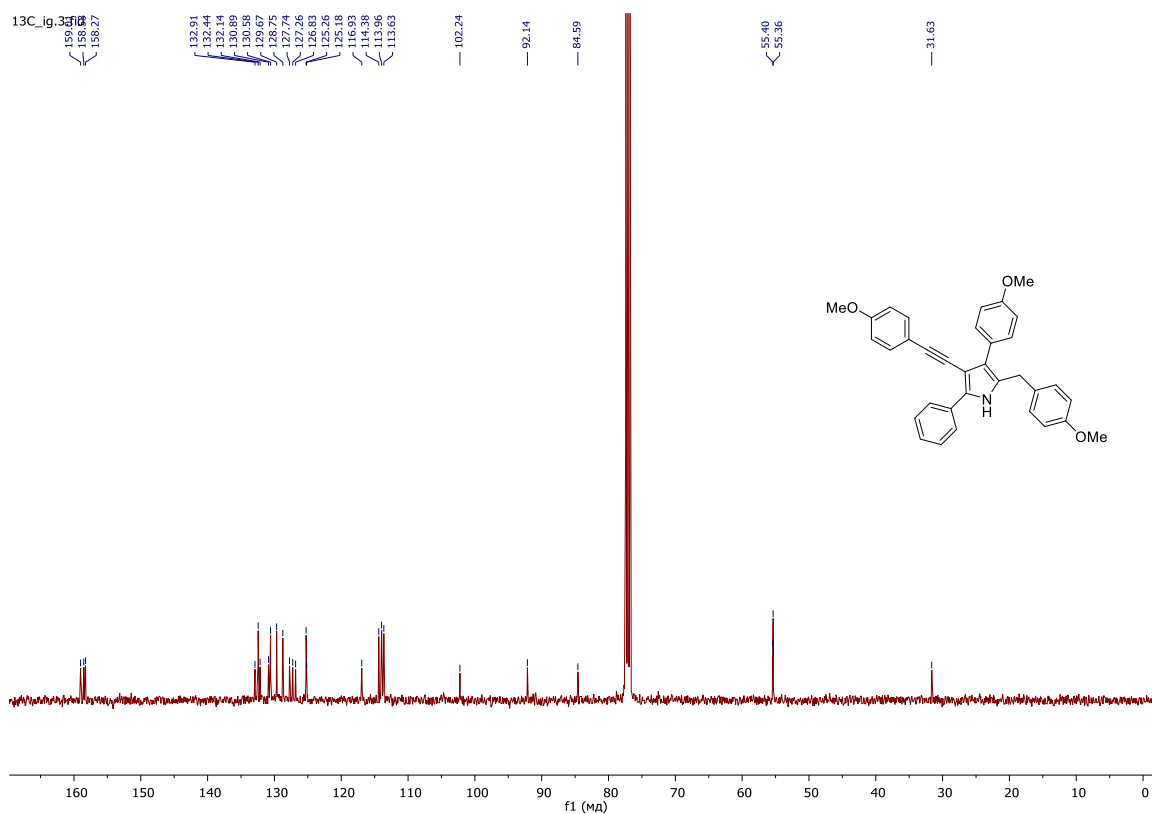

<sup>13</sup>C NMR Spectrum of **3fa** (100.6 MHz, CDCl<sub>3</sub>)

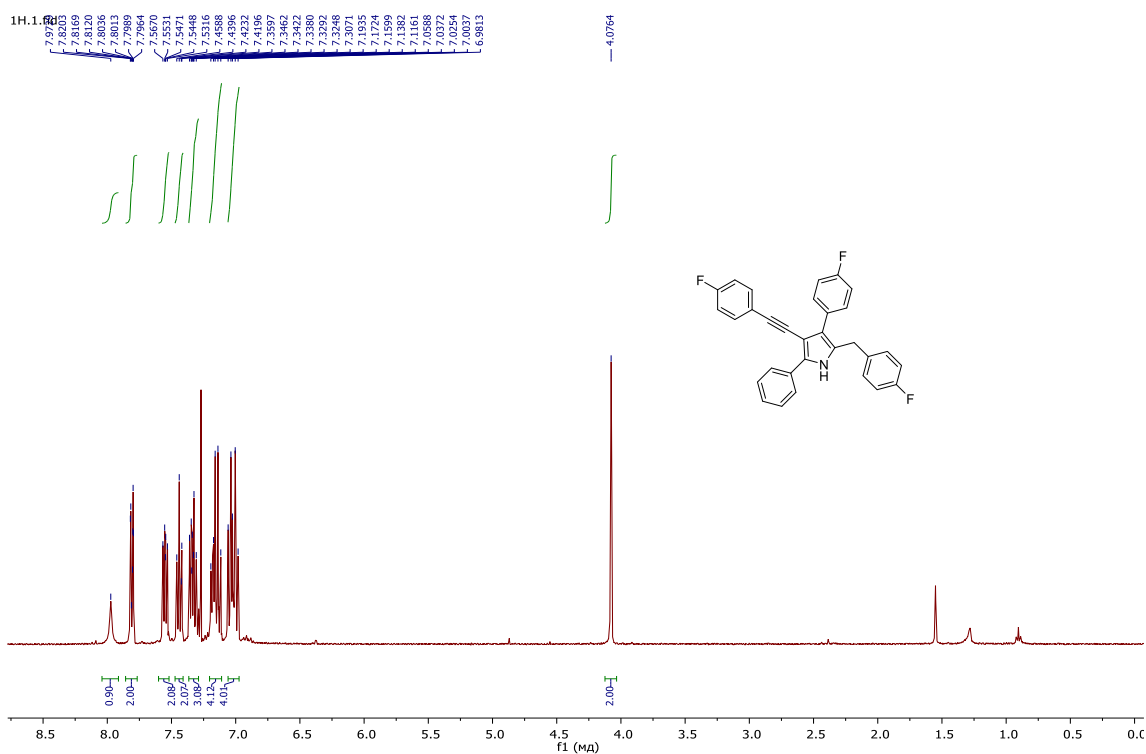

**<sup>1</sup>H NMR Spectrum of 3ga (400.1 MHz, CDCl<sub>3</sub>)**

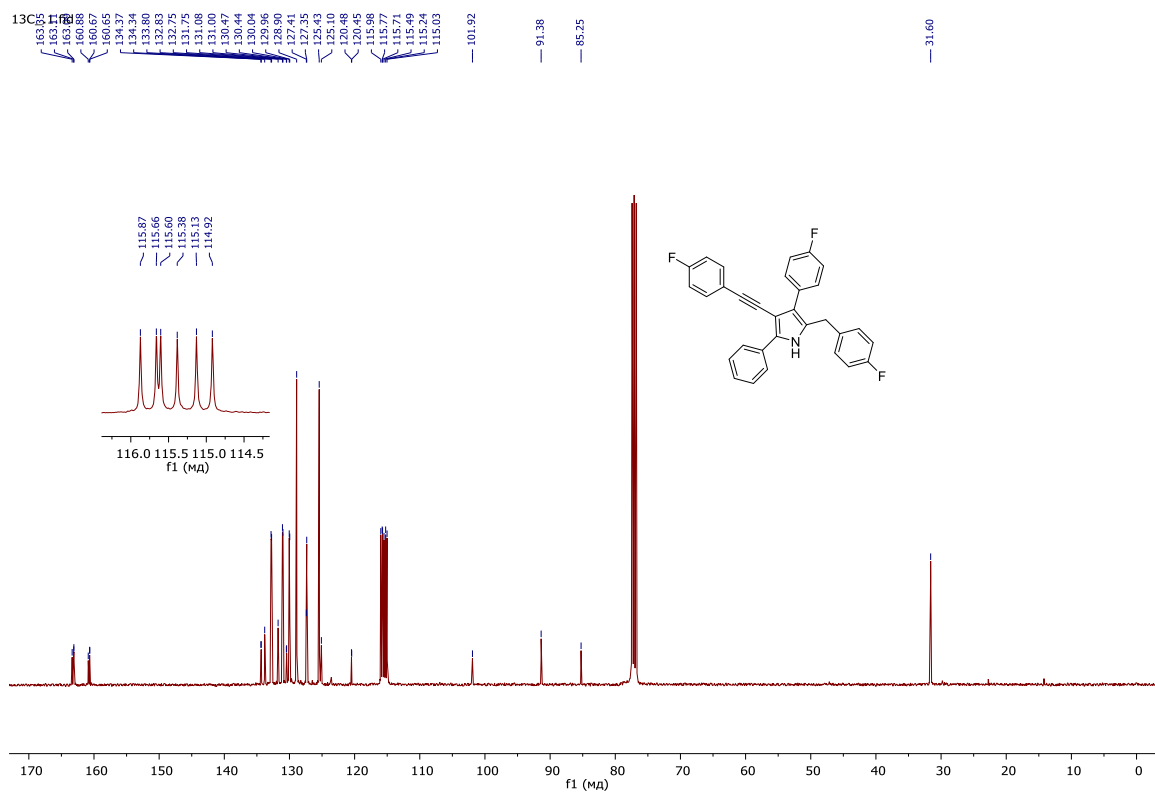

**<sup>13</sup>C NMR Spectrum of 3ga (100.6 MHz, CDCl<sub>3</sub>)**



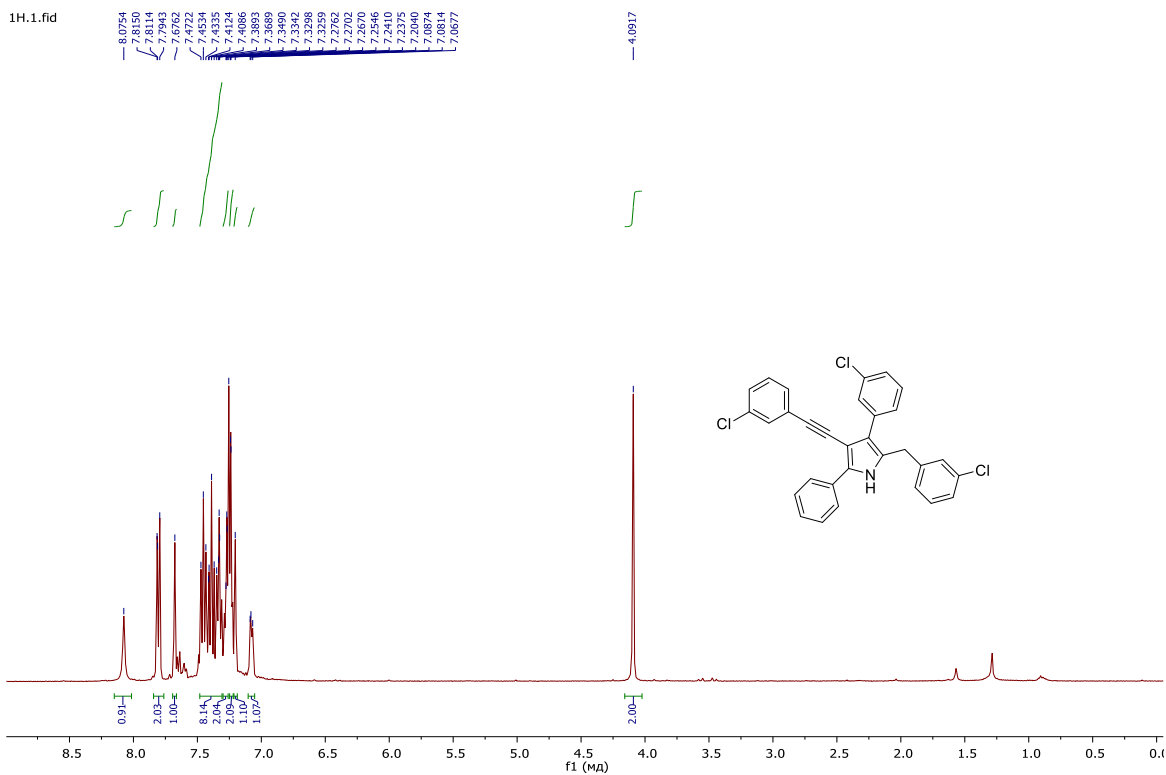

<sup>1</sup>H NMR Spectrum of **3ha** (400.1 MHz, CDCl<sub>3</sub>)

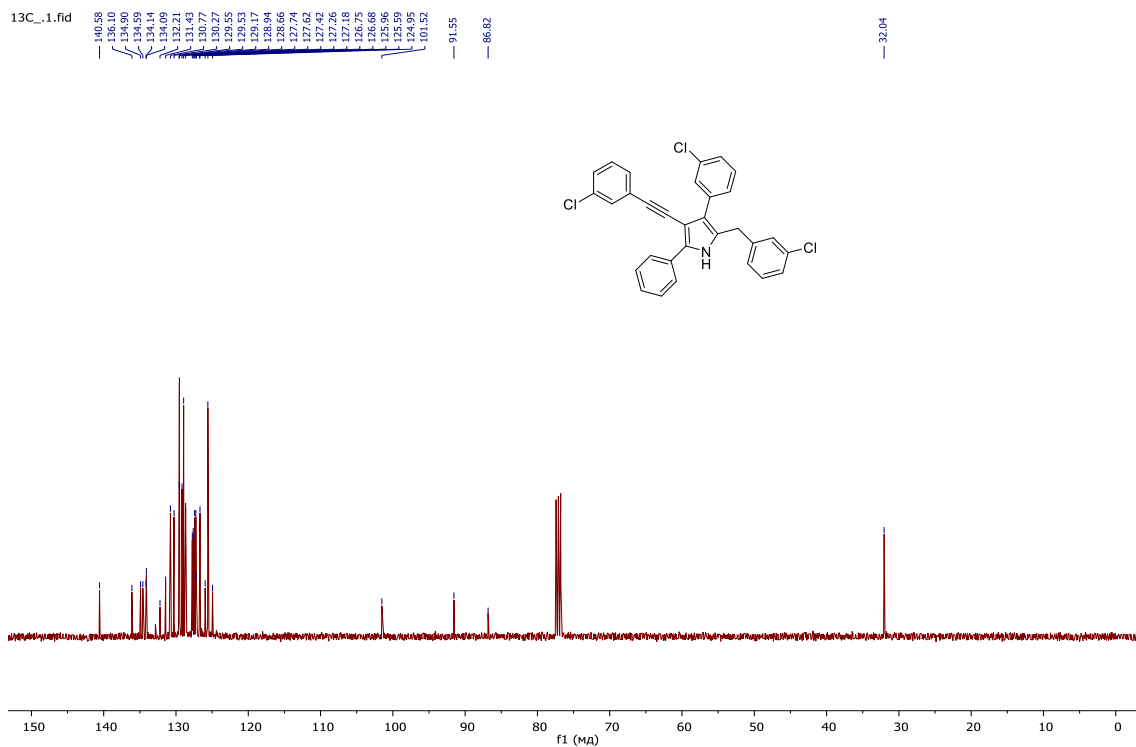

<sup>13</sup>C NMR Spectrum of **3ha** (100.6 MHz, CDCl<sub>3</sub>)

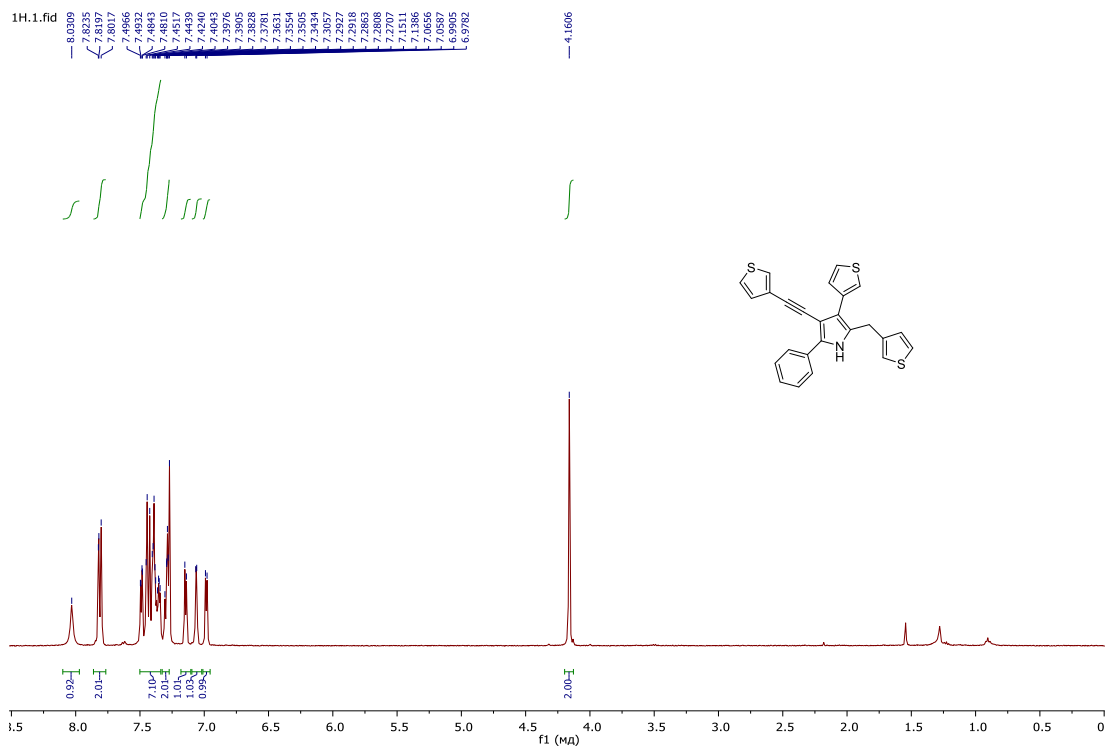

$^1\text{H}$  NMR Spectrum of **3ia** (400.1 MHz,  $\text{CDCl}_3$ )

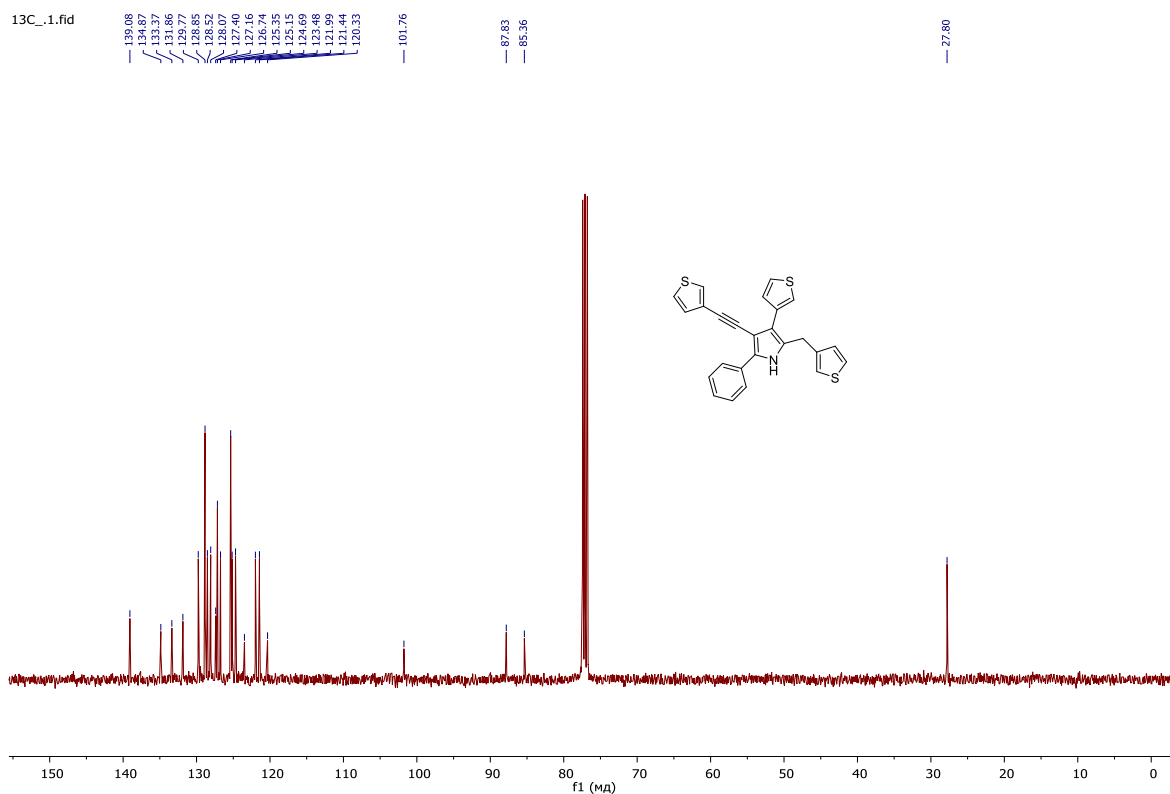

$^{13}\text{C}$  NMR Spectrum of **3ia** (100.6 MHz,  $\text{CDCl}_3$ )

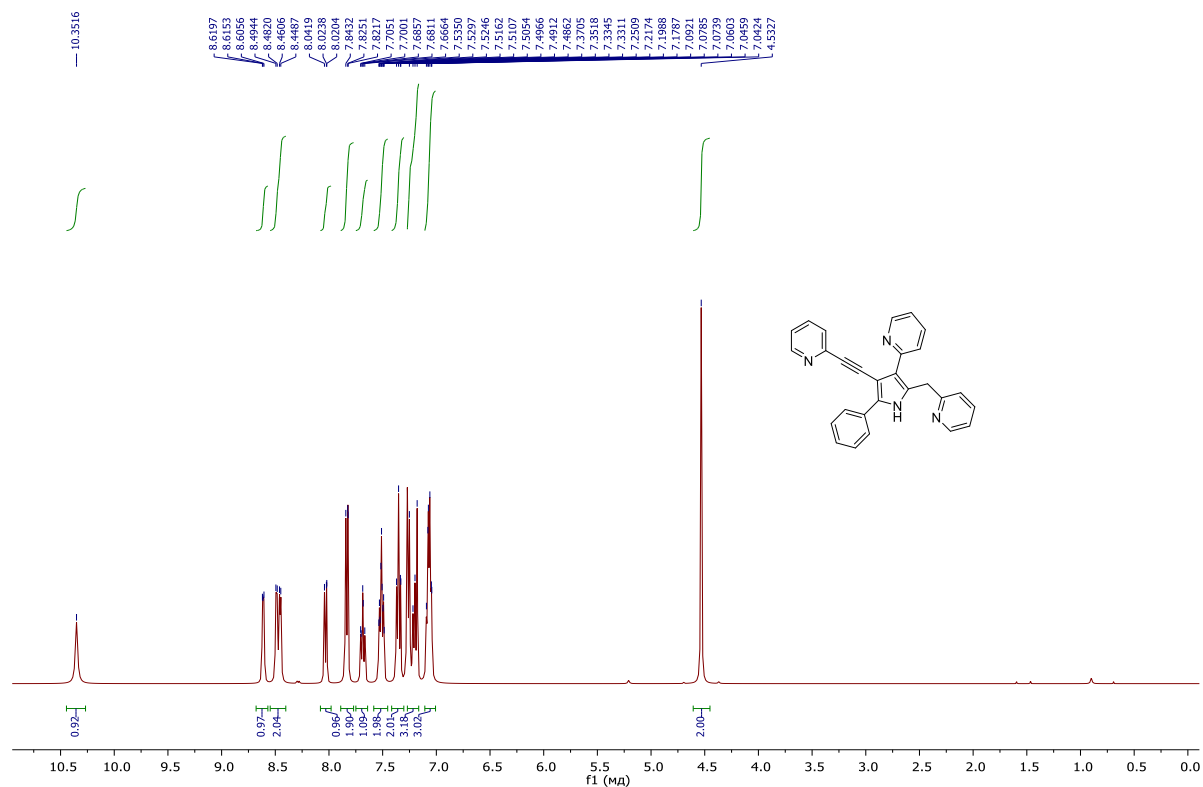

<sup>1</sup>H NMR Spectrum of **3ja** (400.1 MHz, CDCl<sub>3</sub>)

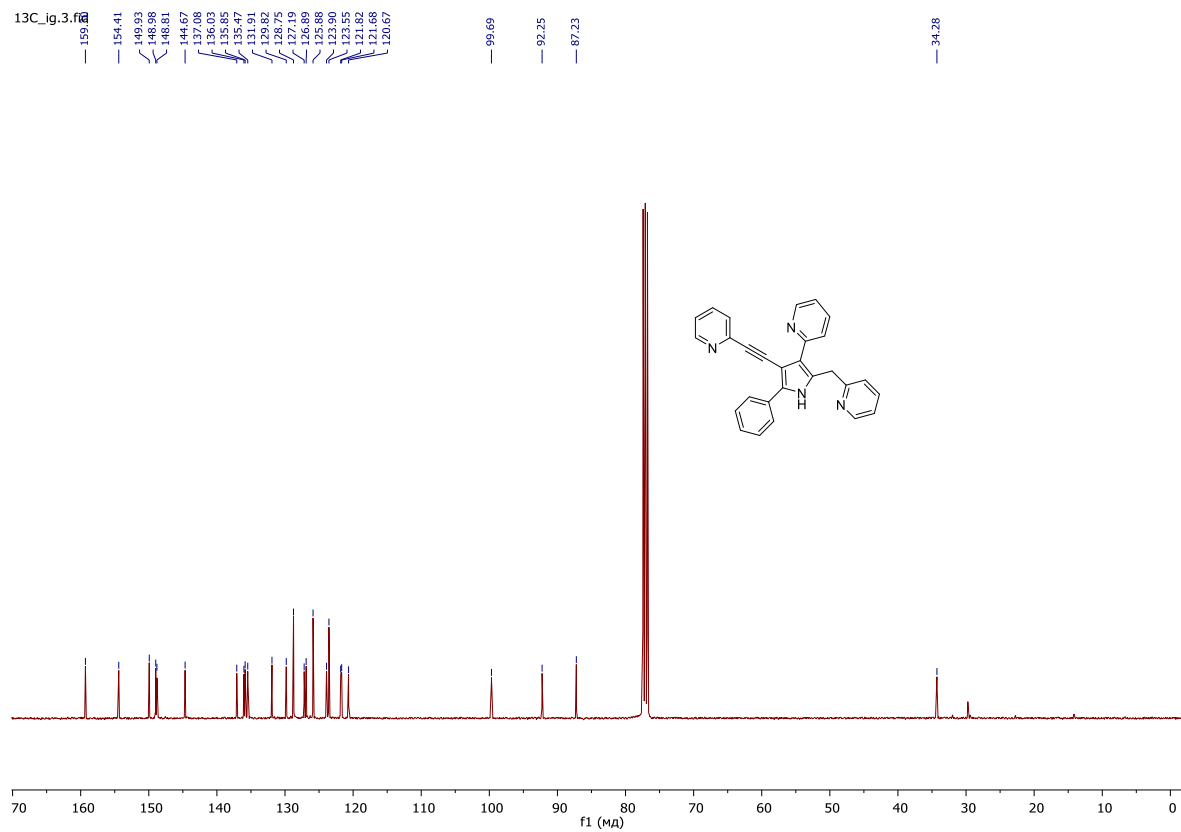

<sup>13</sup>C NMR Spectrum of **3ja** (100.6 MHz, CDCl<sub>3</sub>)

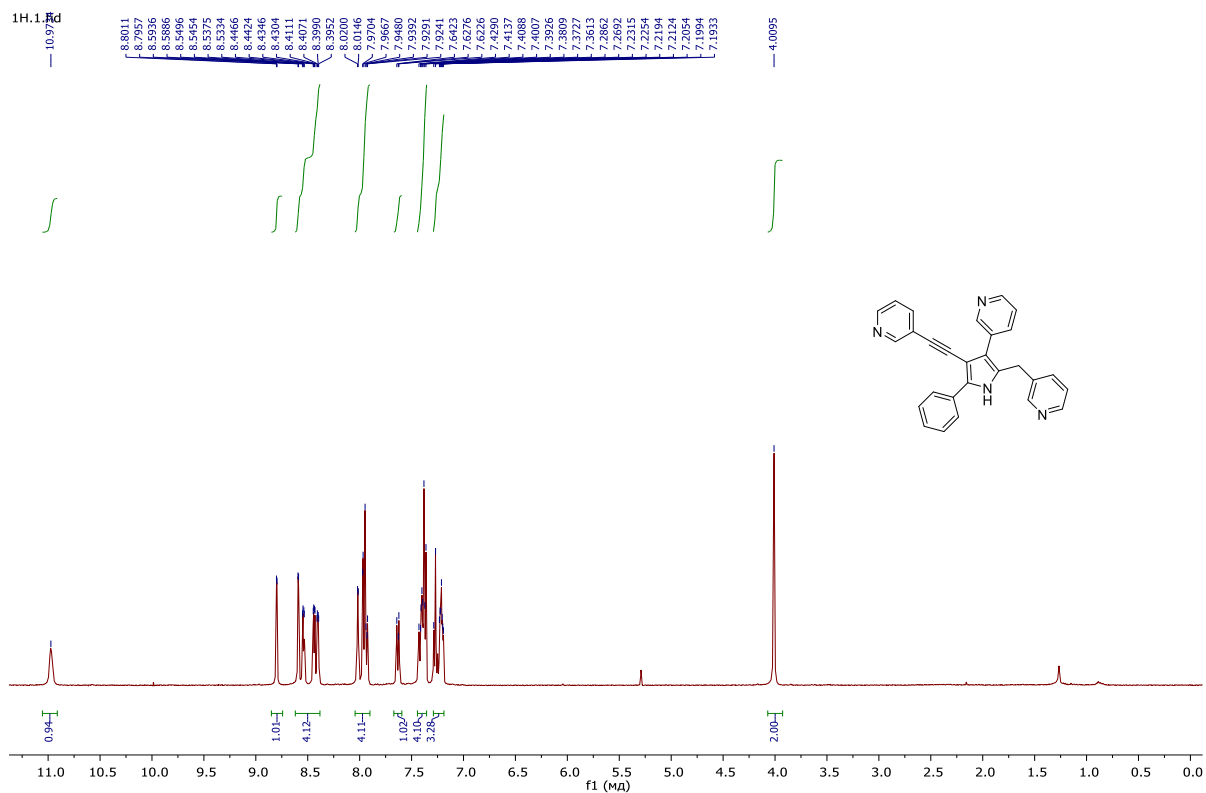

**<sup>1</sup>H NMR Spectrum of **3ka** (400.1 MHz, CDCl<sub>3</sub>)**

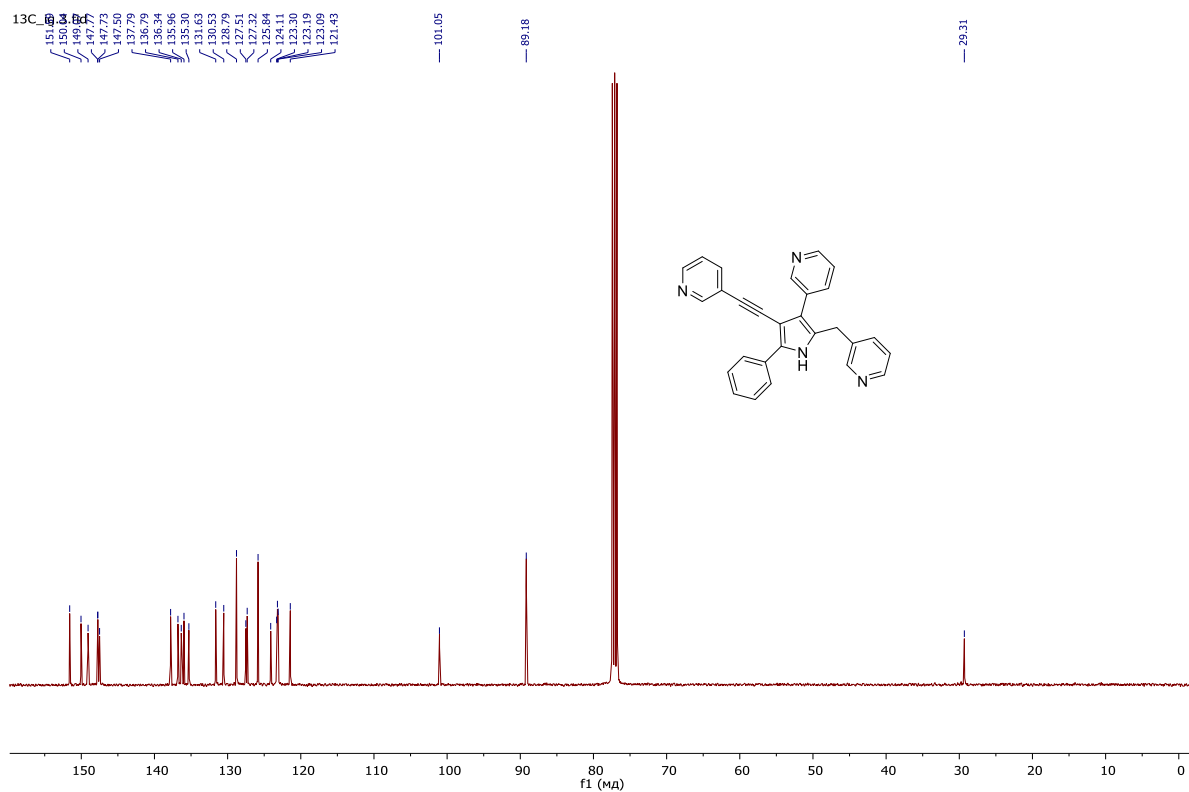

**<sup>13</sup>C NMR Spectrum of **3ka** (100.6 MHz, CDCl<sub>3</sub>)**

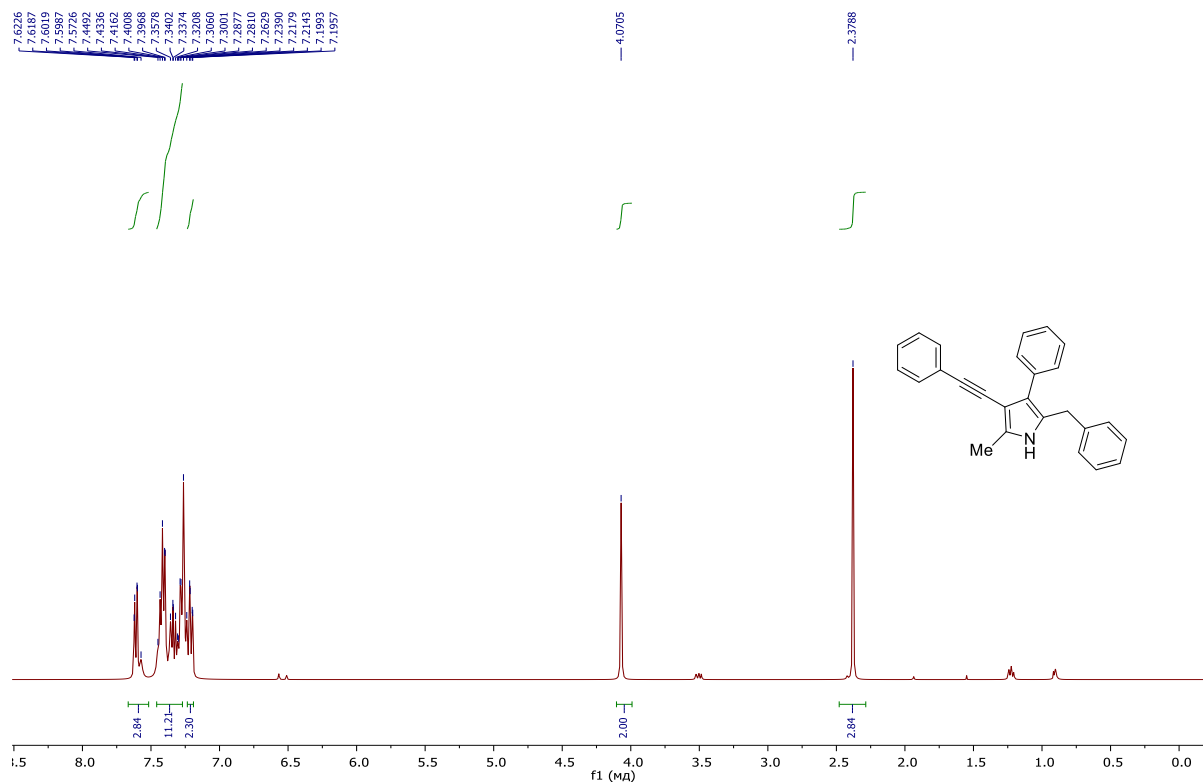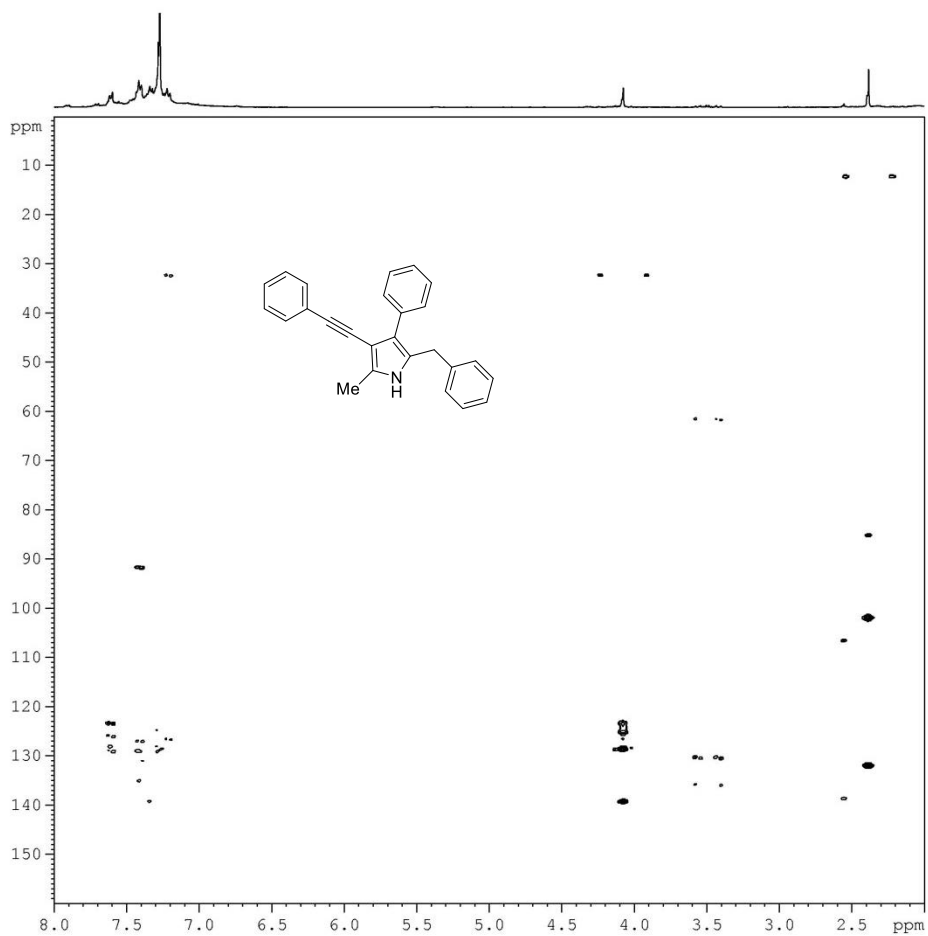

2D <sup>1</sup>H-<sup>13</sup>C HMBC Spectrum of **3ab**

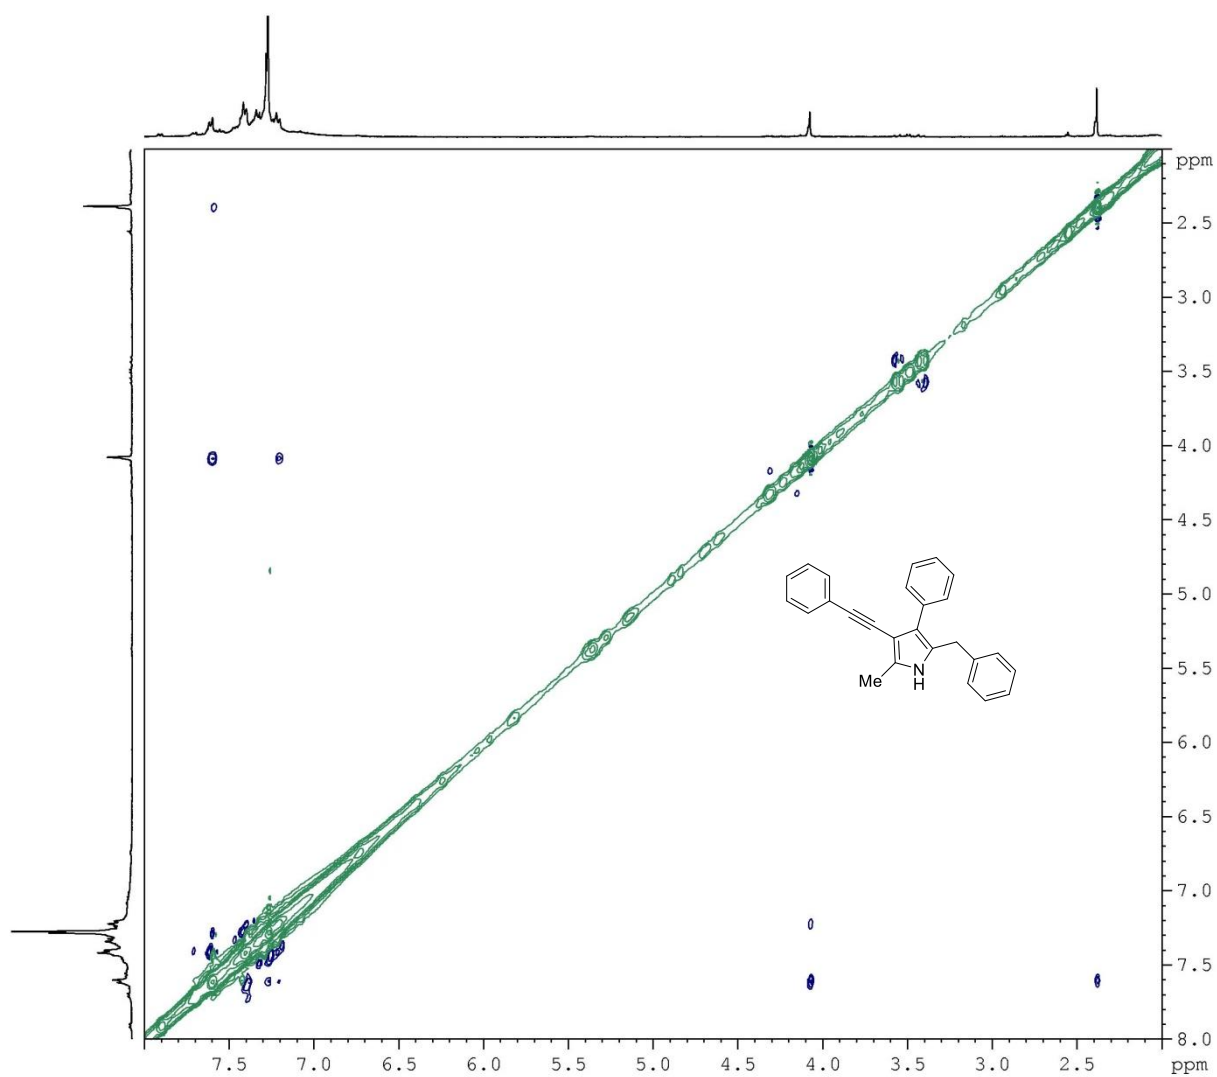

2D NOESY Spectrum of **3ab**

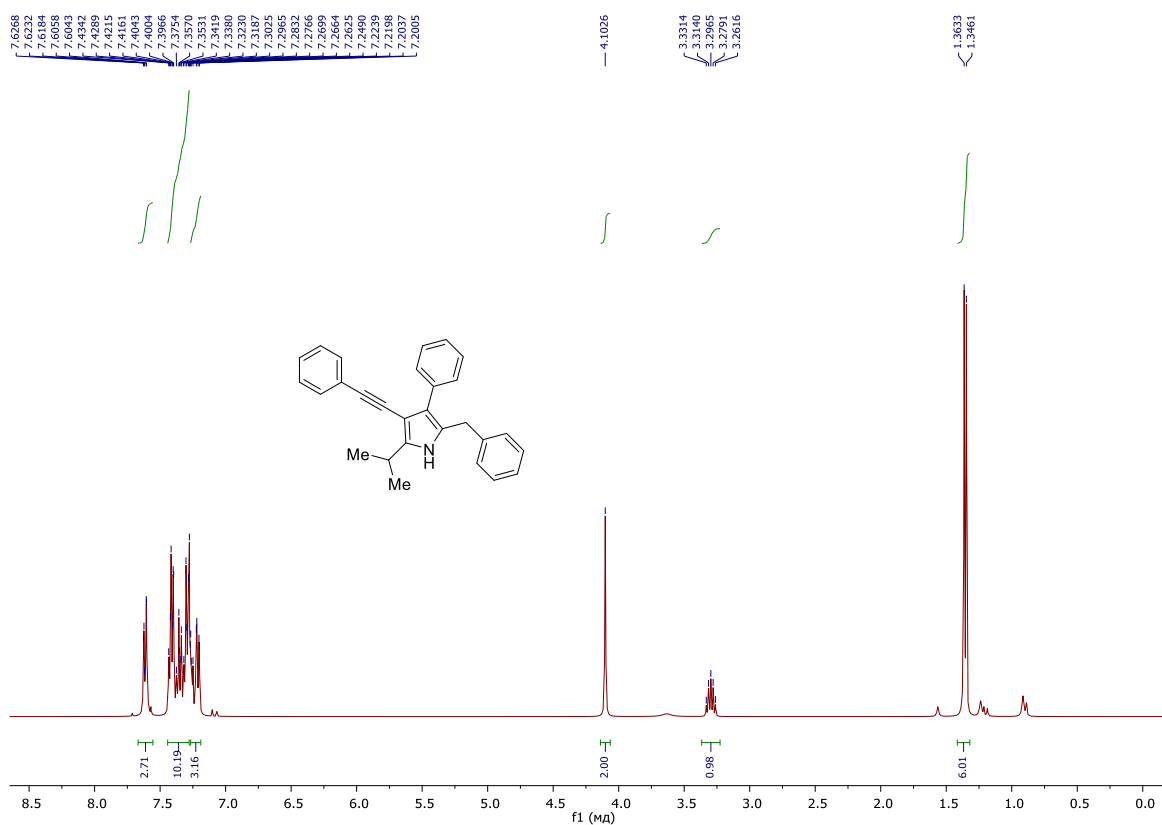

<sup>1</sup>H NMR Spectrum of **3ac** (400.1 MHz, CDCl<sub>3</sub>)

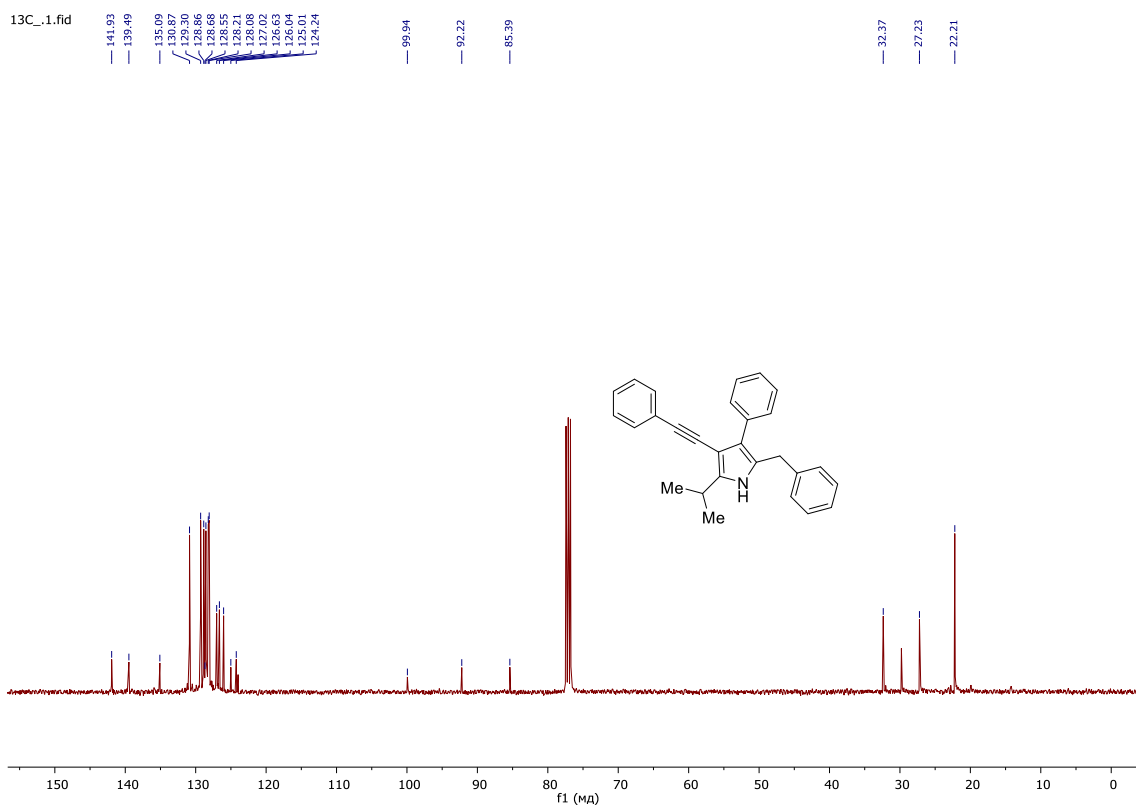

<sup>13</sup>C NMR Spectrum of **3ac** (100.6 MHz, CDCl<sub>3</sub>)

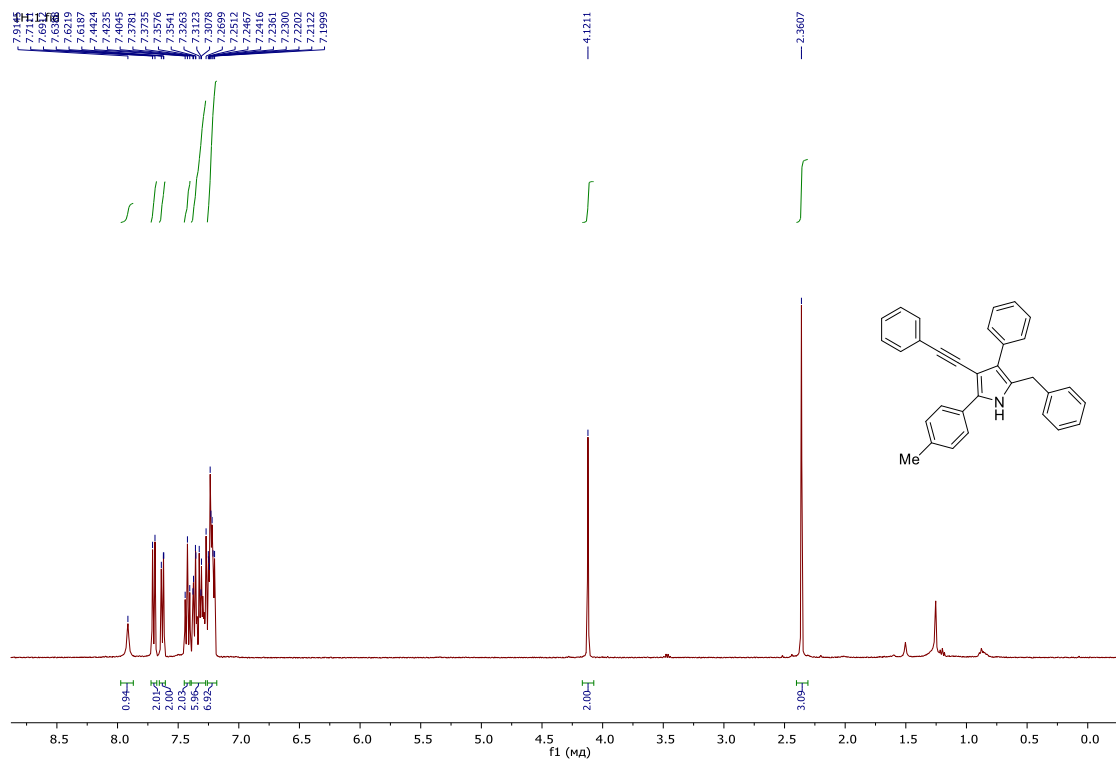

**<sup>1</sup>H NMR Spectrum of 3ae (400.1 MHz, CDCl<sub>3</sub>)**

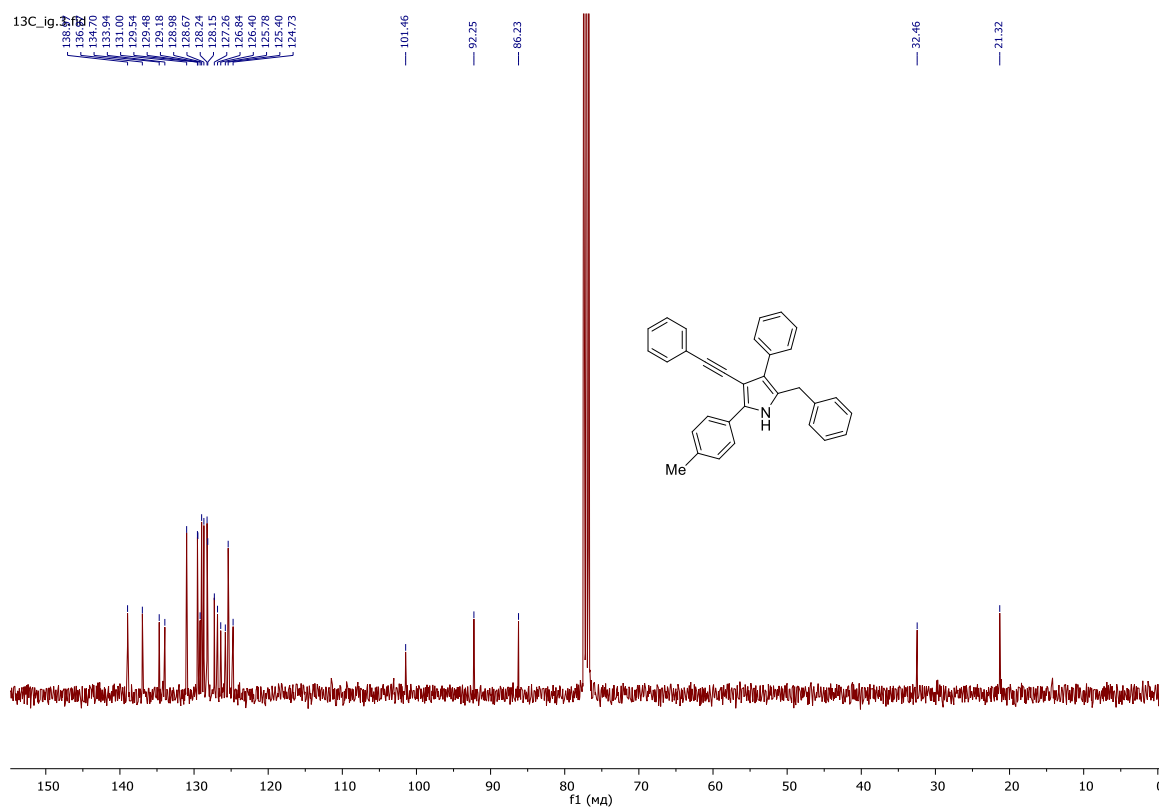

**<sup>13</sup>C NMR Spectrum of 3ae (100.6 MHz, CDCl<sub>3</sub>)**



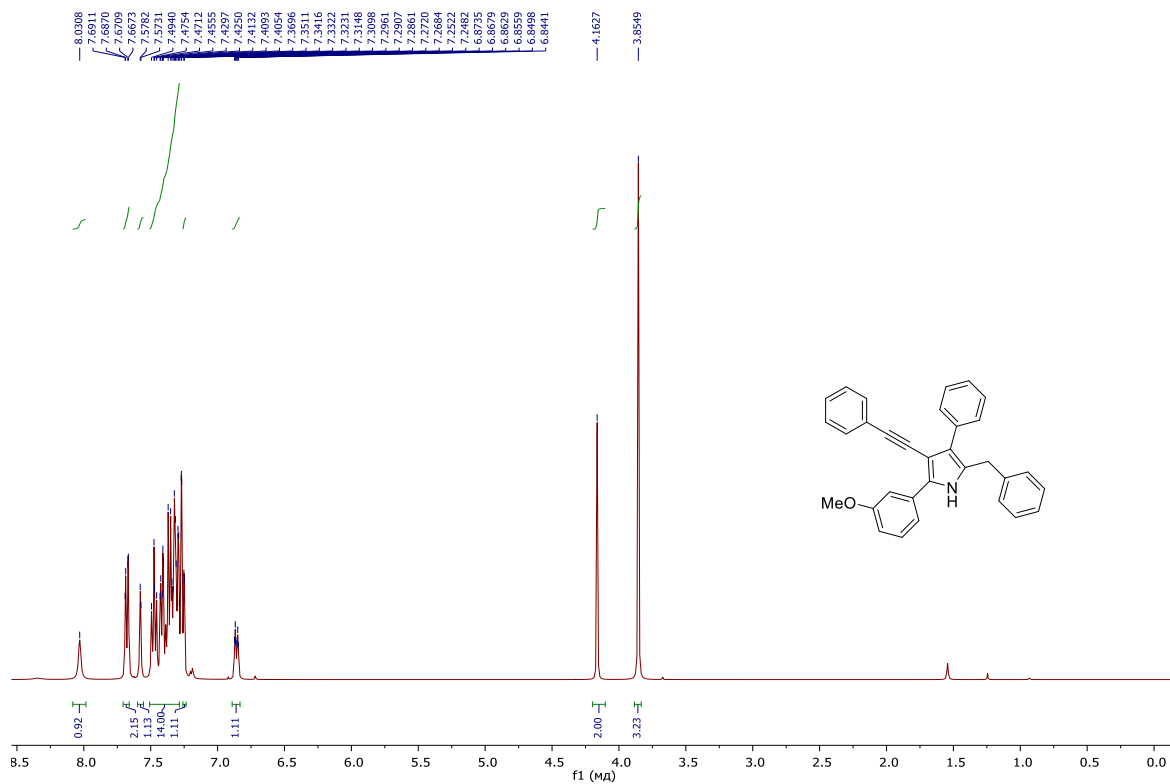

**<sup>1</sup>H NMR Spectrum of 3af (400.1 MHz, CDCl<sub>3</sub>)**

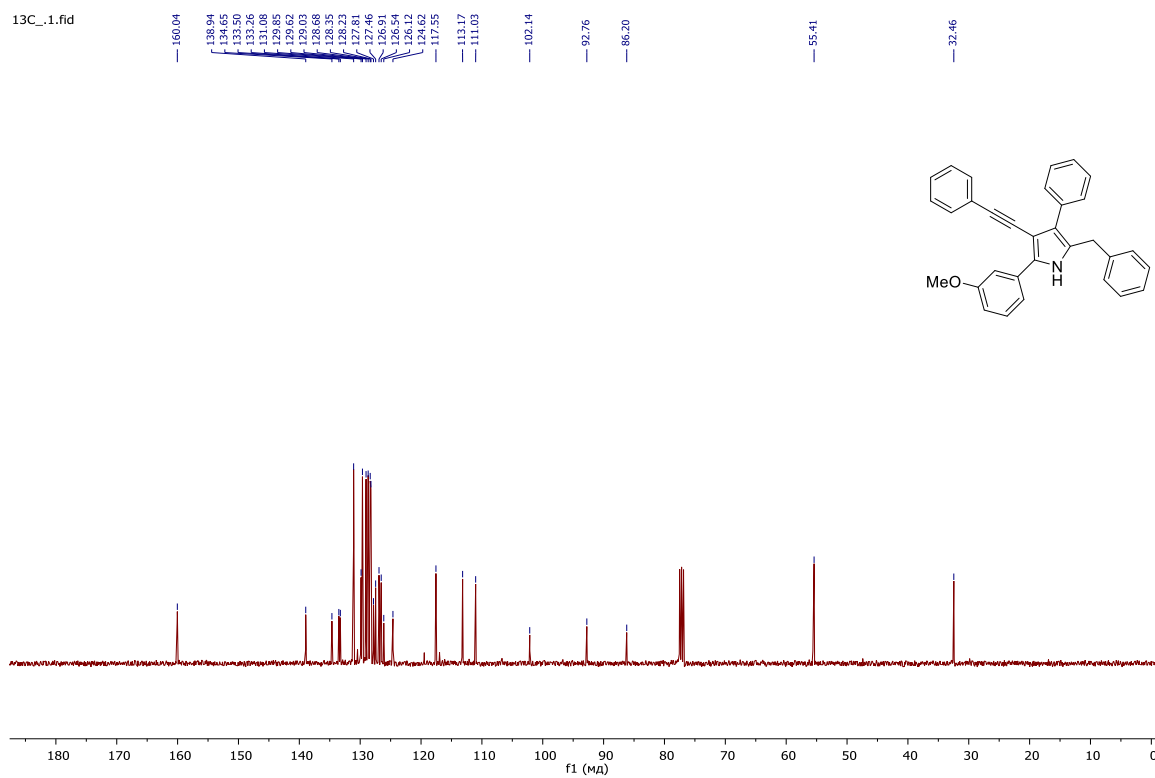

**<sup>13</sup>C NMR Spectrum of 3af (100.6 MHz, CDCl<sub>3</sub>)**

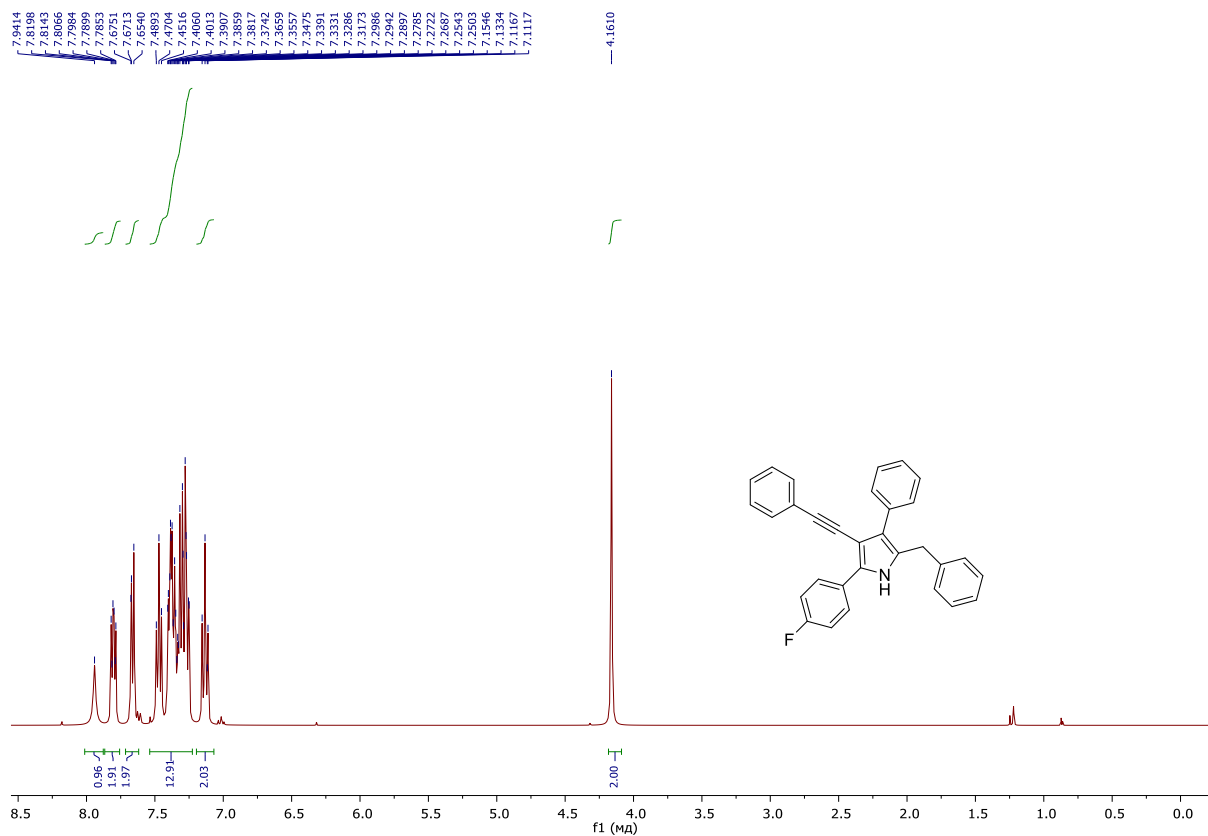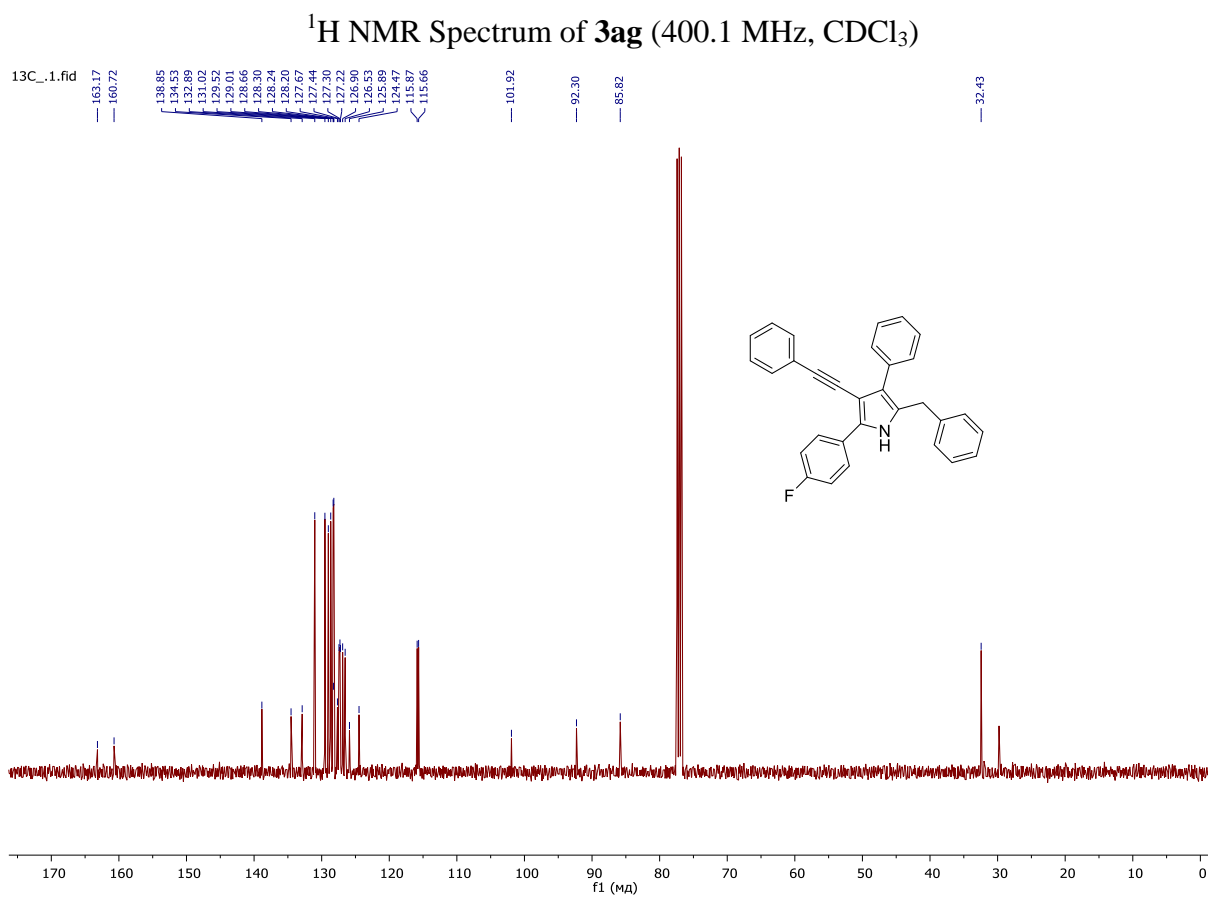

**<sup>13</sup>C NMR Spectrum of **3ag** (100.6 MHz, CDCl<sub>3</sub>)**

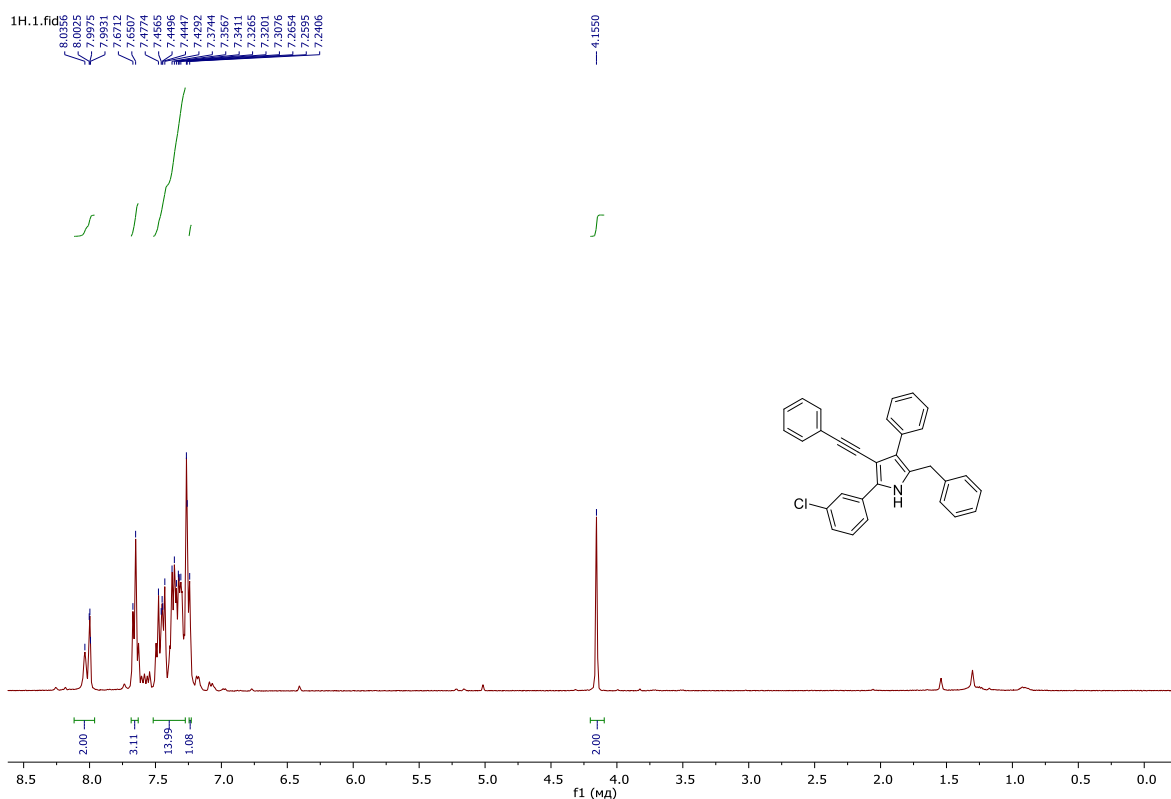

<sup>1</sup>H NMR Spectrum of **3ah** (400.1 MHz, CDCl<sub>3</sub>)

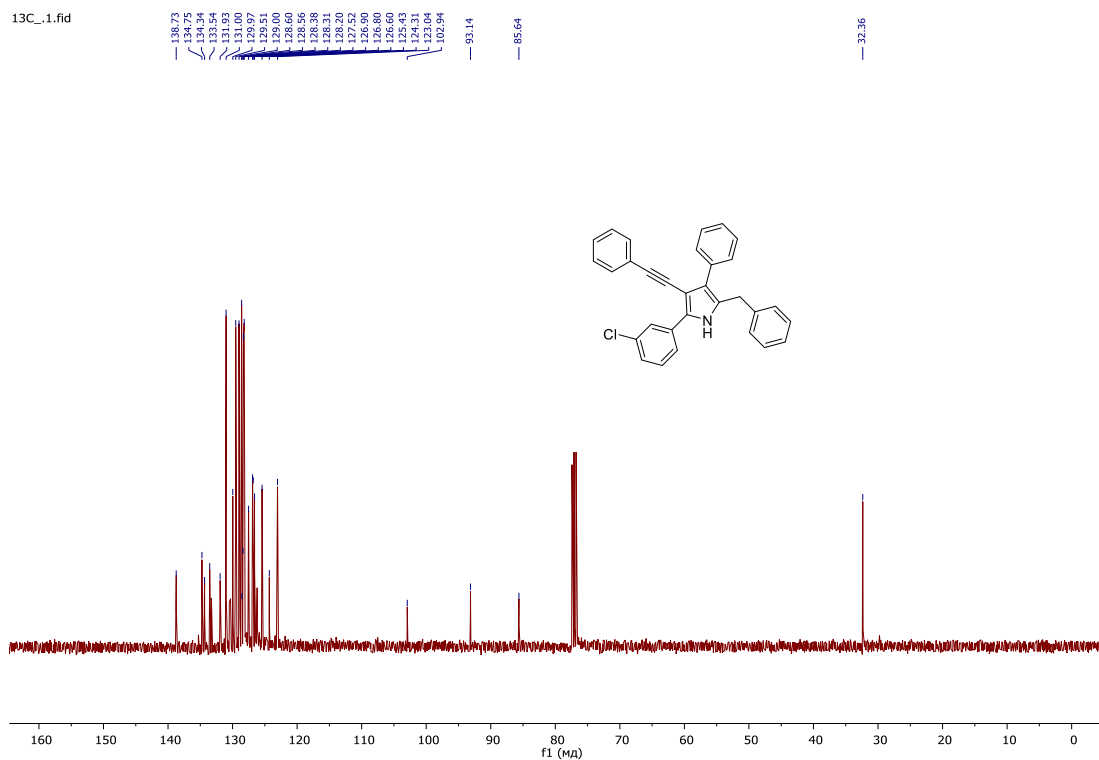

<sup>13</sup>C NMR Spectrum of **3ah** (100.6 MHz, CDCl<sub>3</sub>)

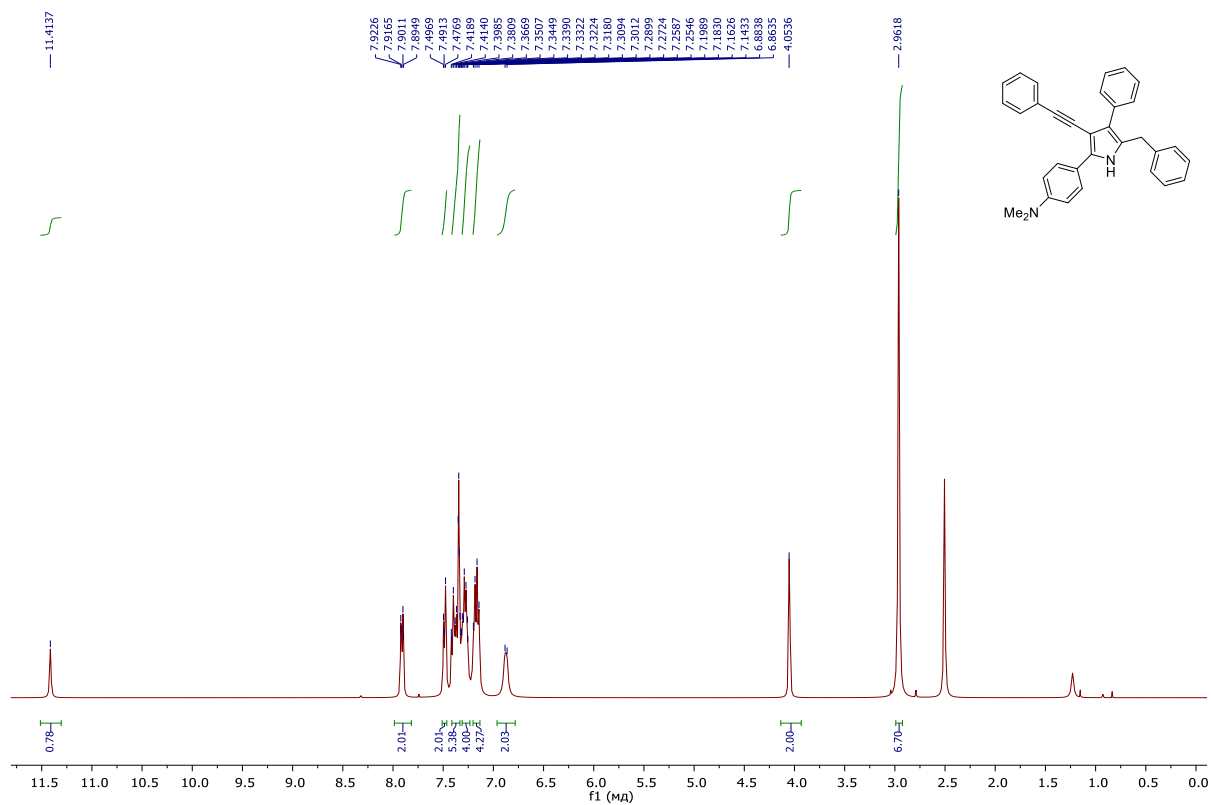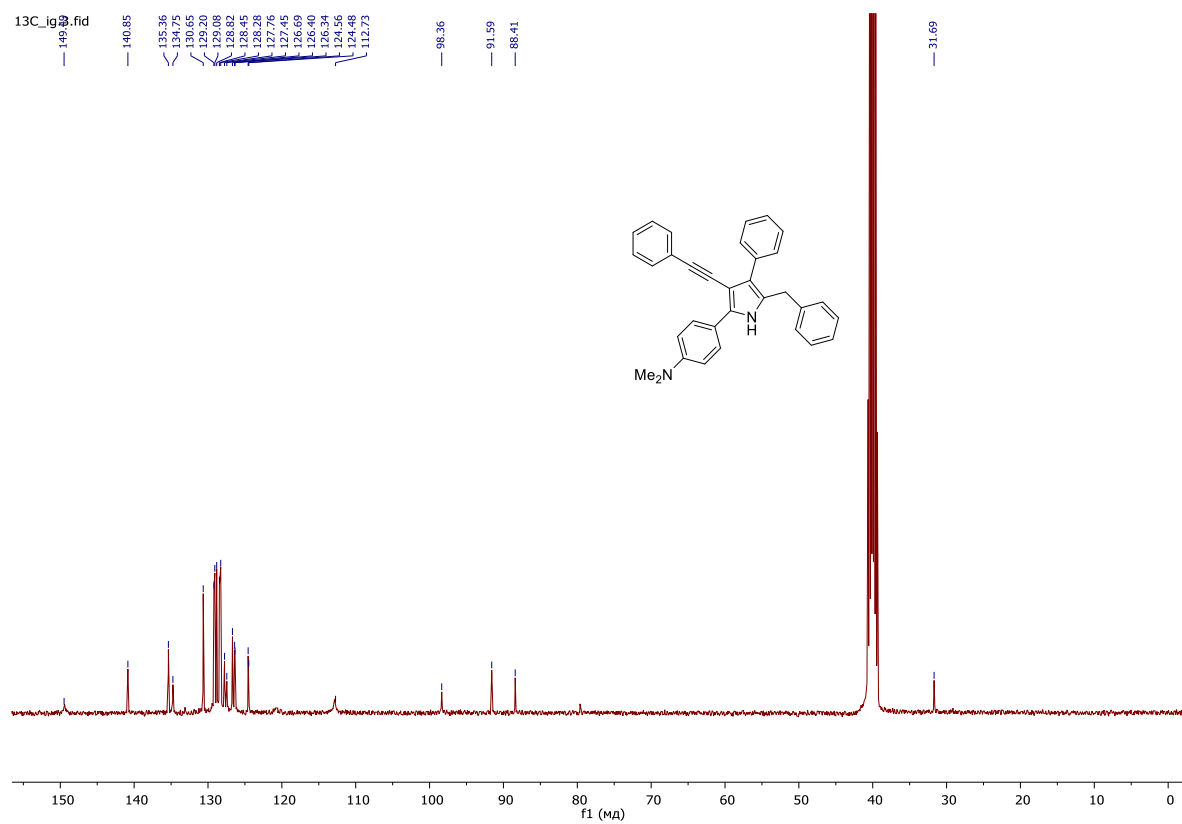

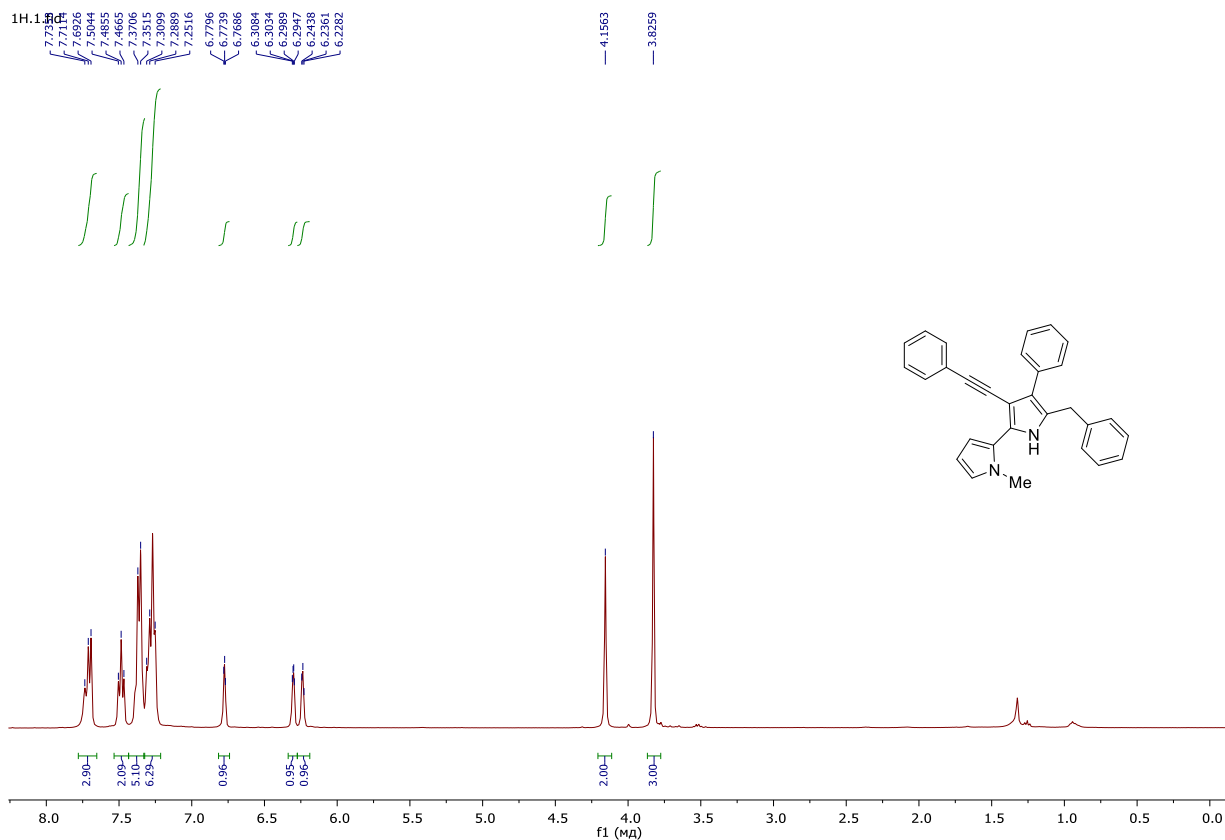

**<sup>1</sup>H NMR Spectrum of **3ak** (400.1 MHz, CDCl<sub>3</sub>)**

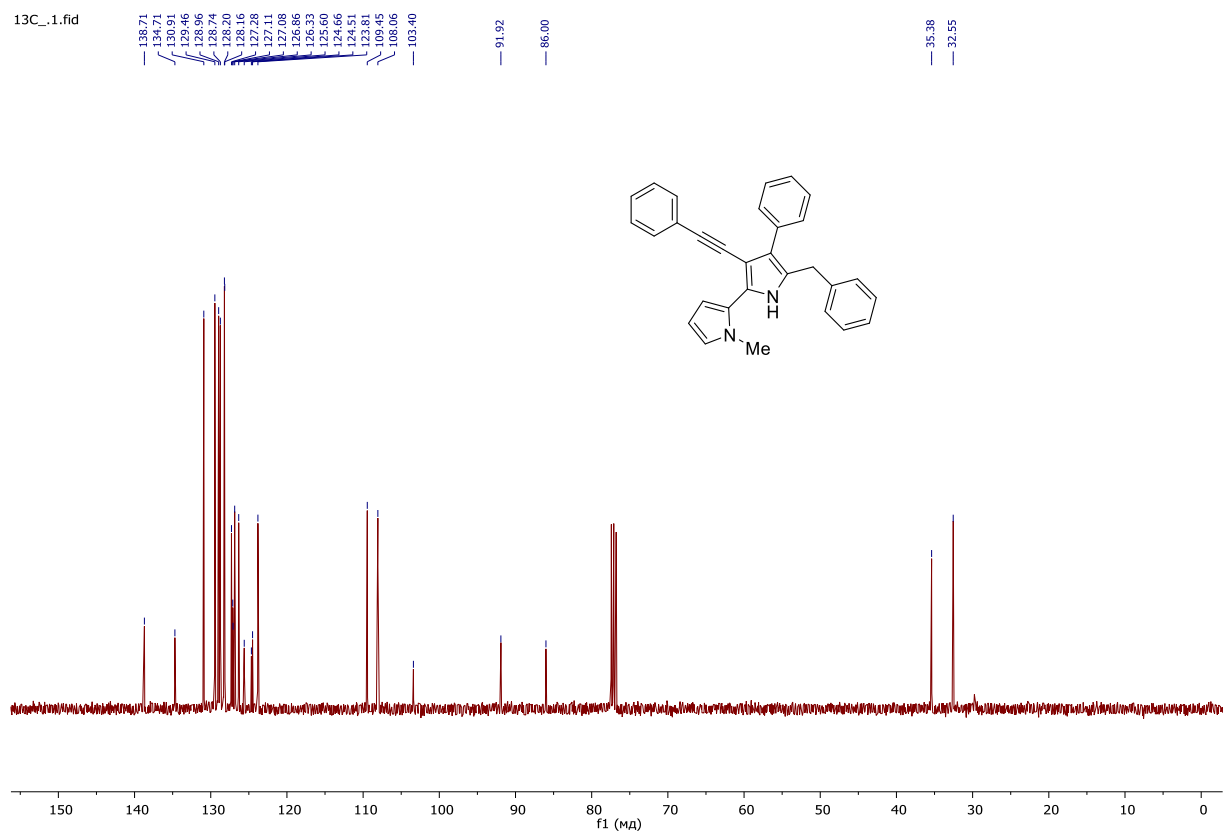

**<sup>13</sup>C NMR Spectrum of **3ak** (100.6 MHz, CDCl<sub>3</sub>)**

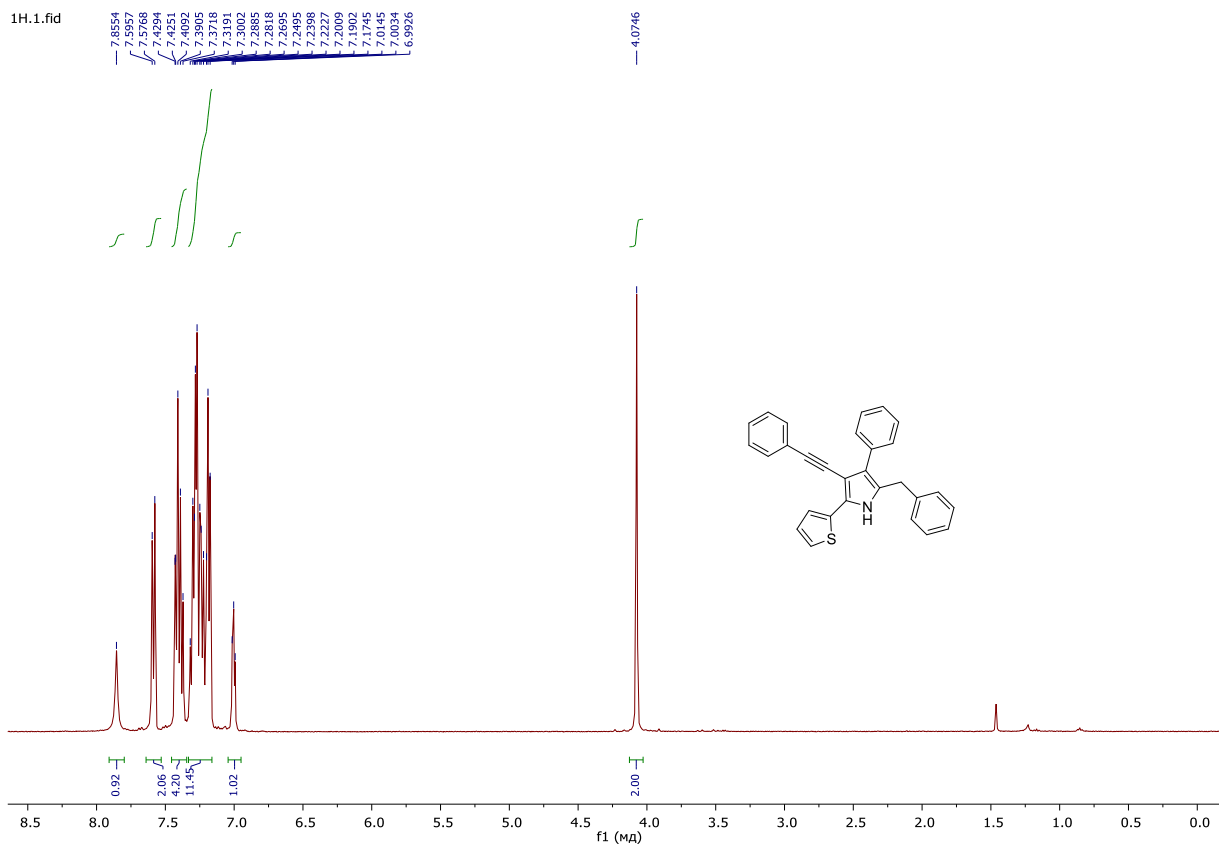

$^1\text{H}$  NMR Spectrum of **3al** (400.1 MHz,  $\text{CDCl}_3$ )

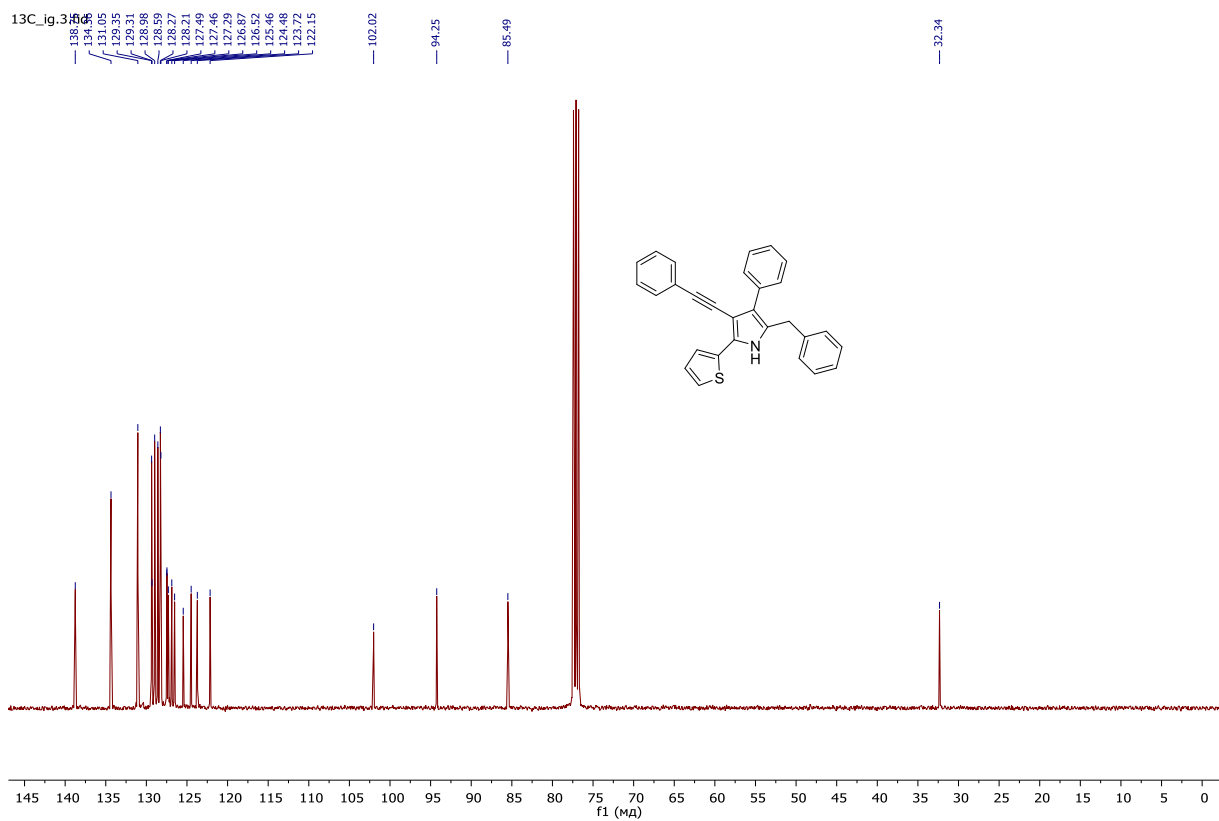

$^{13}\text{C}$  NMR Spectrum of **3al** (100.6 MHz,  $\text{CDCl}_3$ )

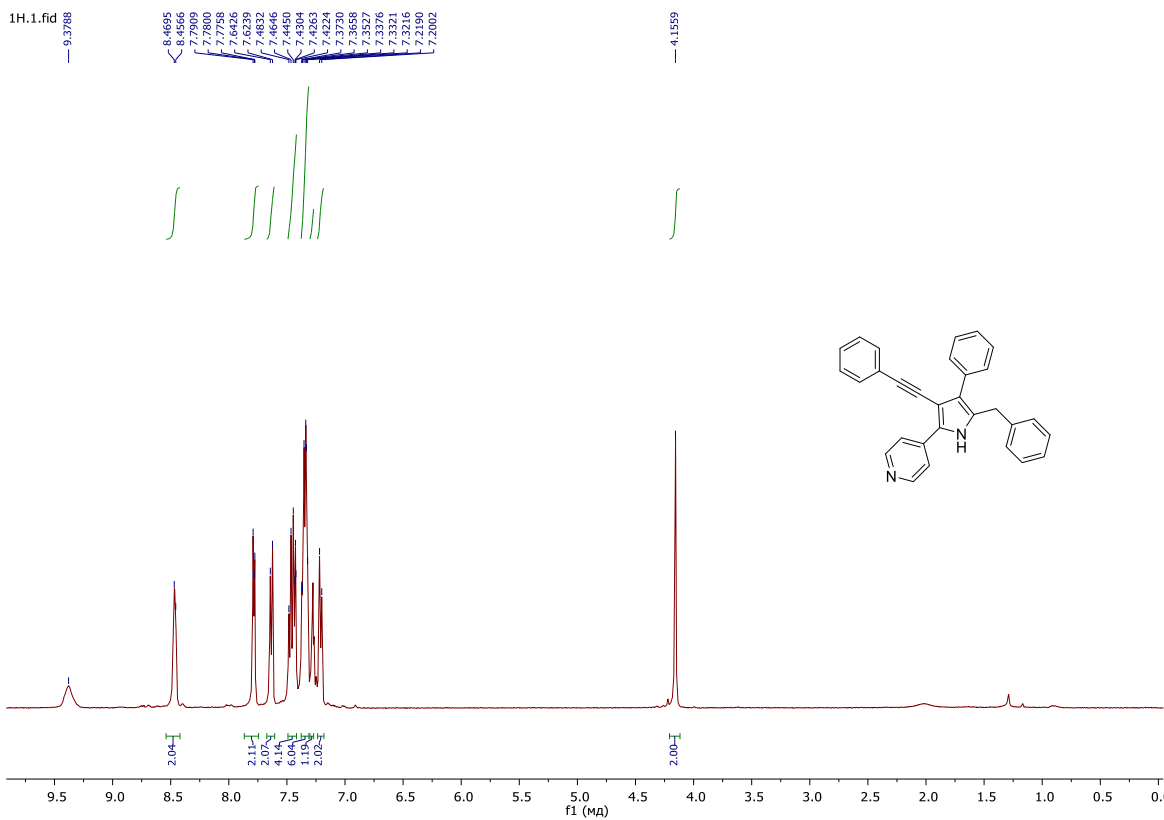

<sup>1</sup>H NMR Spectrum of **3am** (400.1 MHz, CDCl<sub>3</sub>)

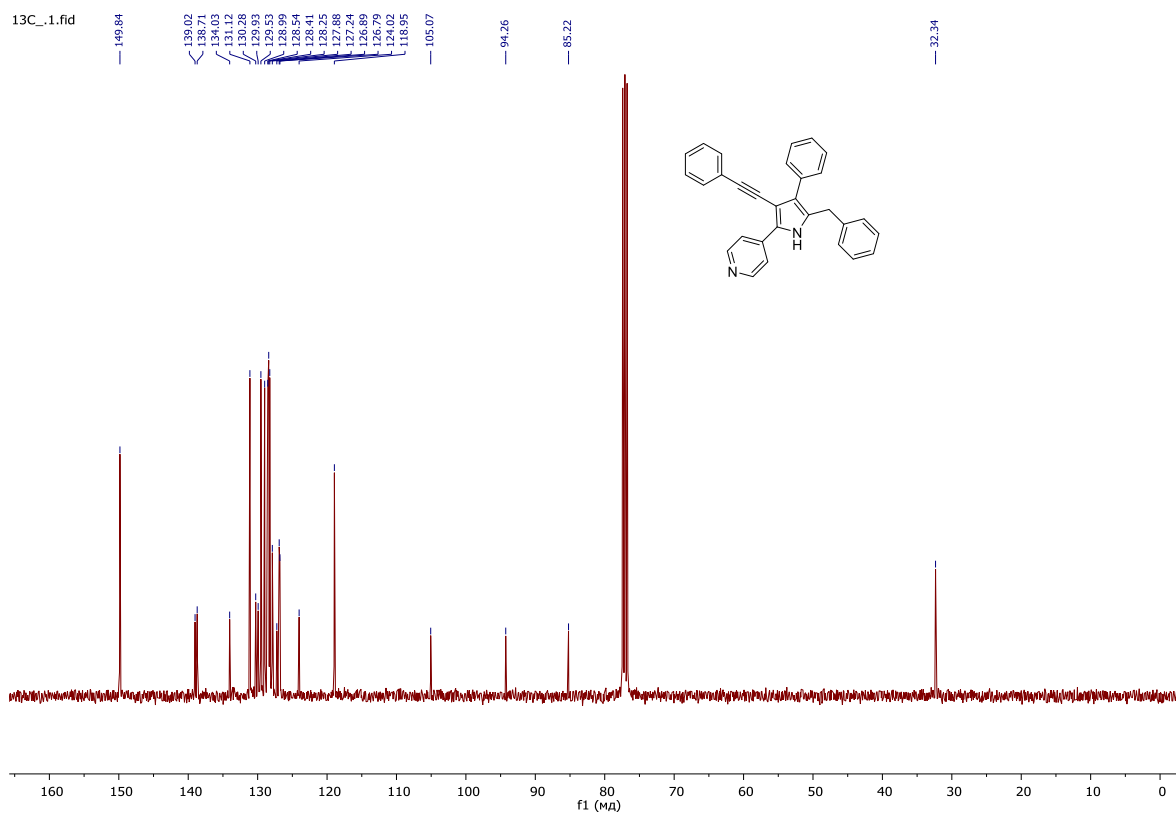

<sup>13</sup>C NMR Spectrum of **3am** (100.6 MHz, CDCl<sub>3</sub>)

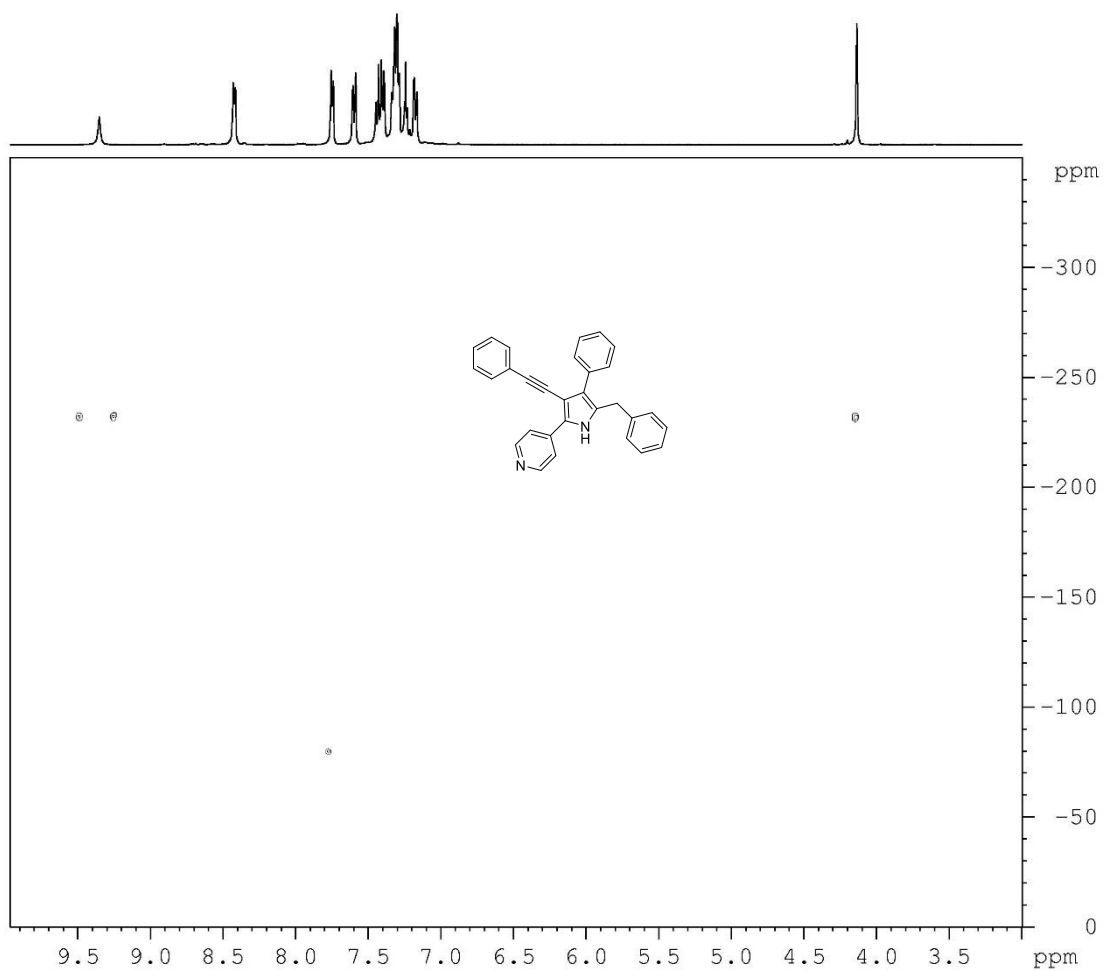

2D  $^1\text{H}$ - $^{15}\text{N}$  HMBC Spectrum of **3am**



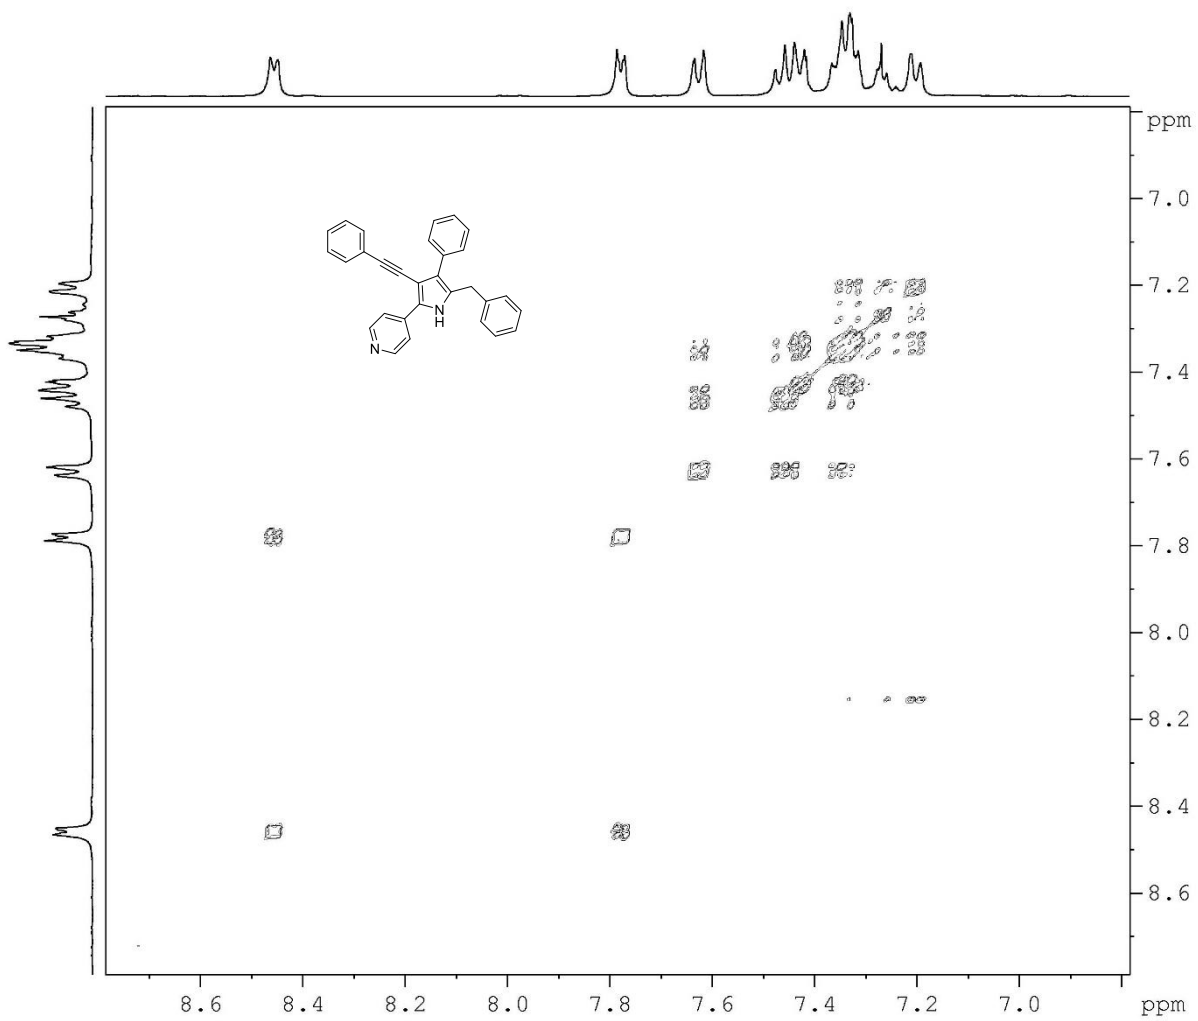

2D COSY Spectrum of **3am**

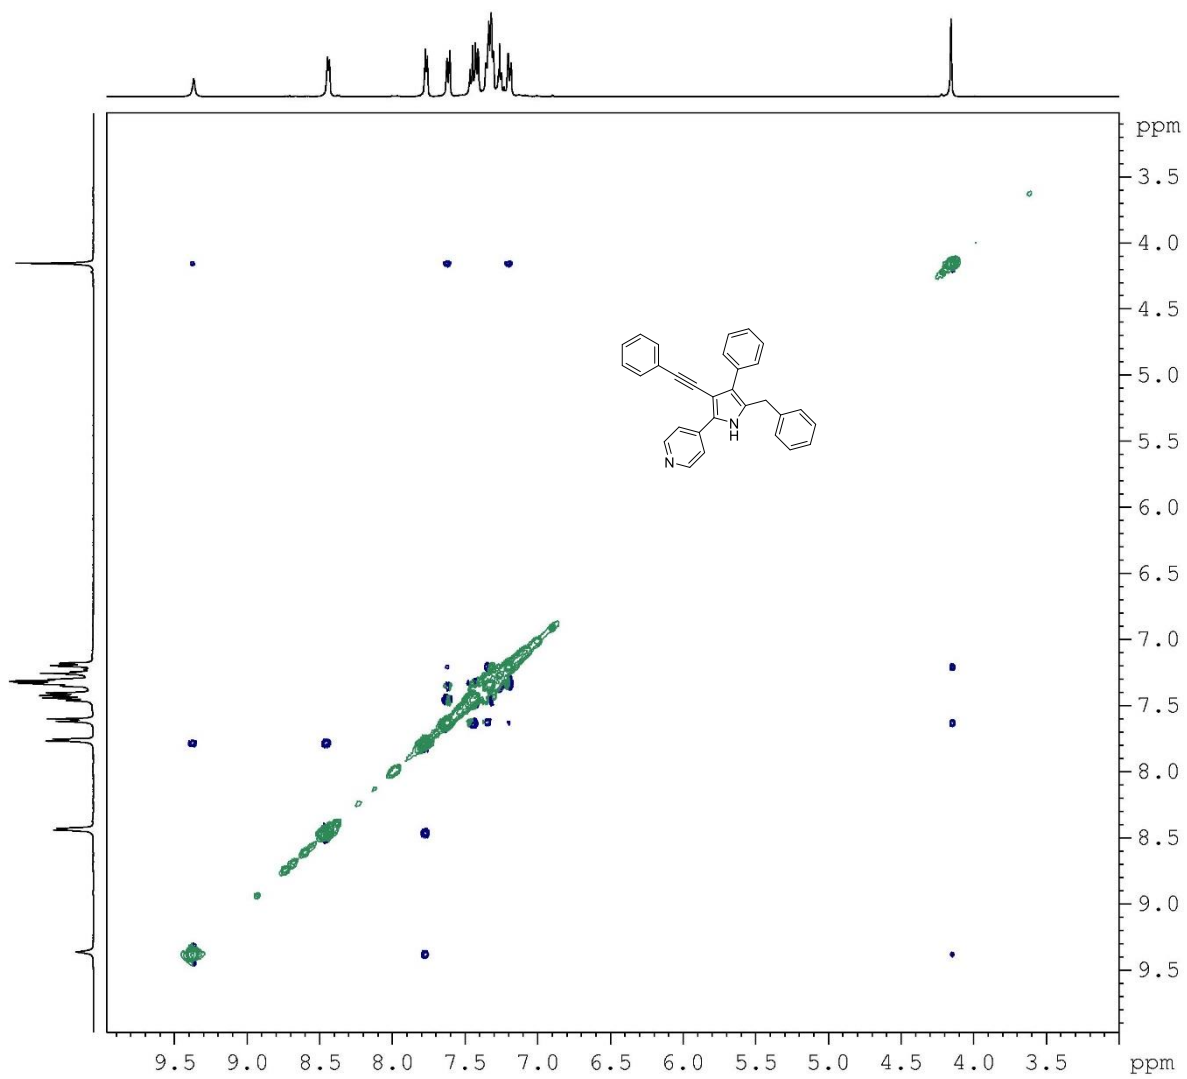

2D NOESY Spectrum of **3am**

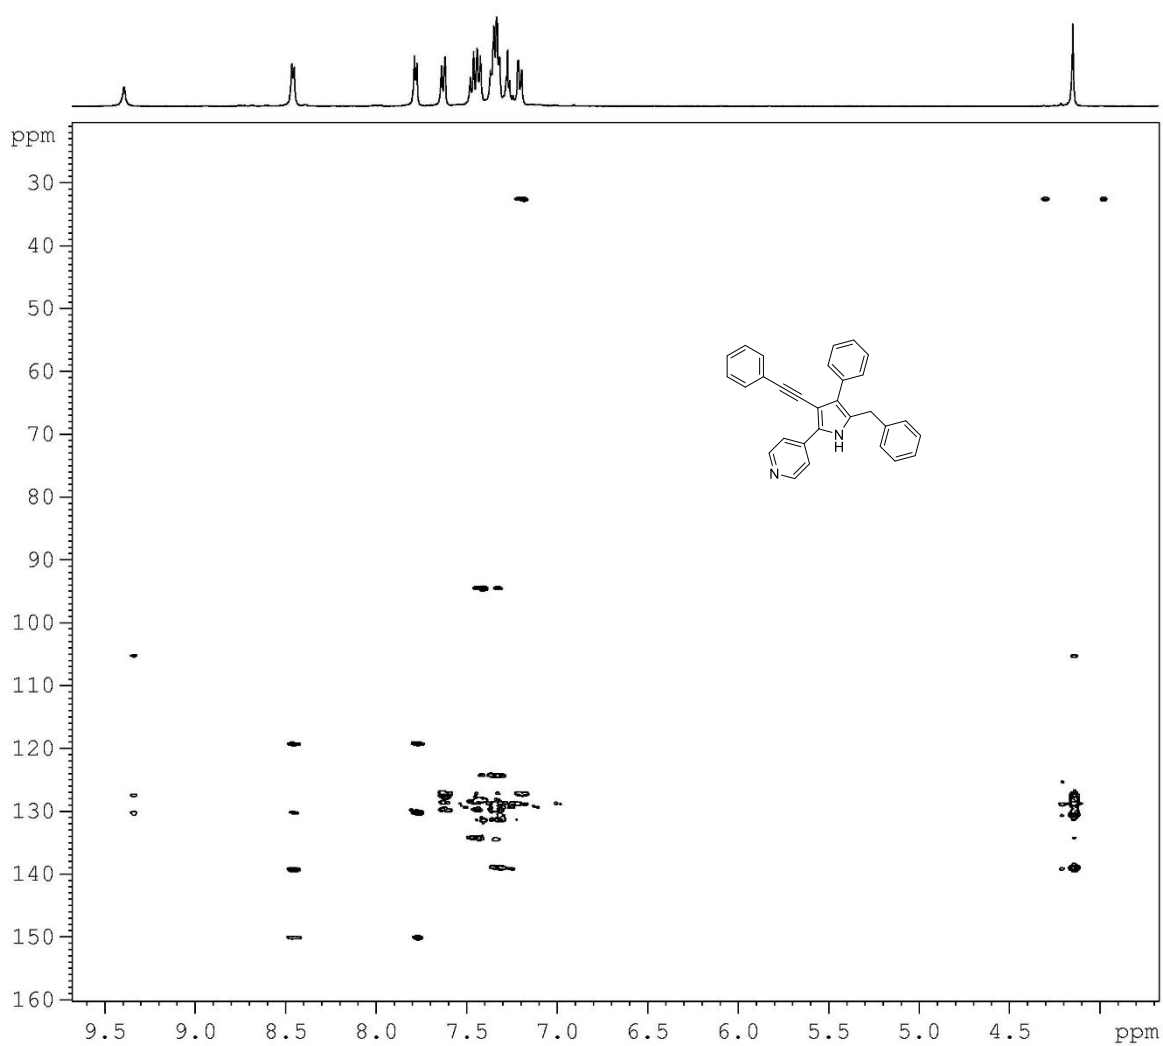

2D  $^1\text{H}$ - $^{13}\text{C}$  HMBC Spectrum of **3am**

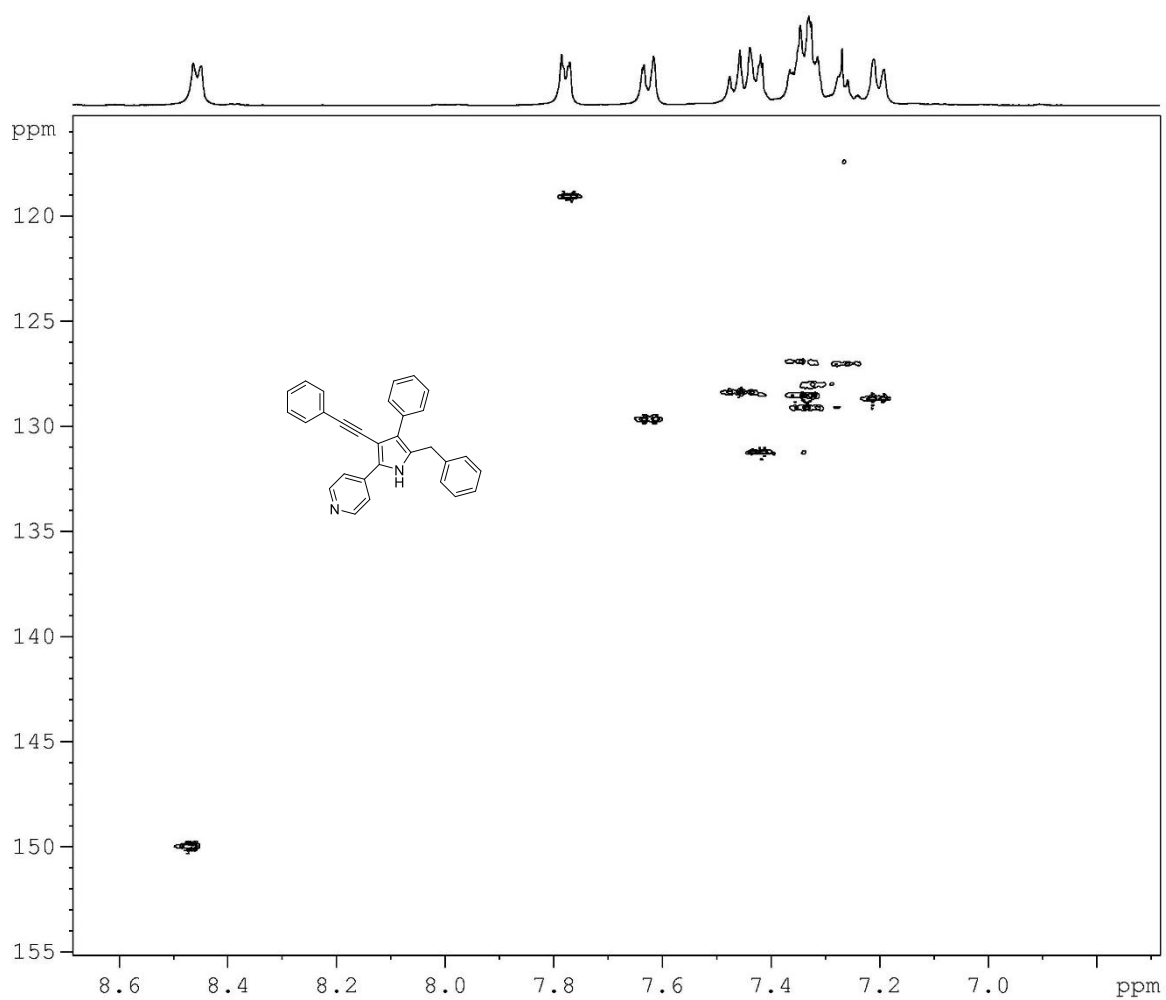

2D  $^1\text{H}$ - $^{13}\text{C}$  HSQC Spectrum of **3am**

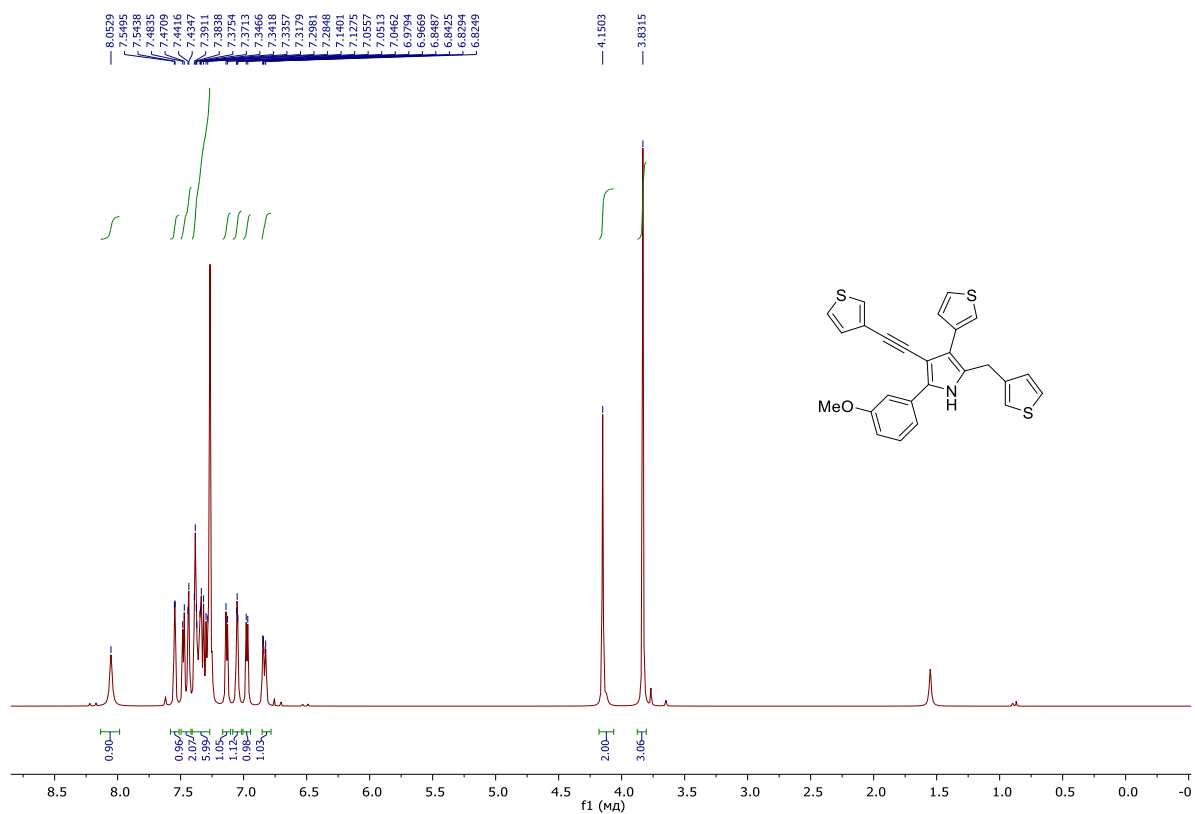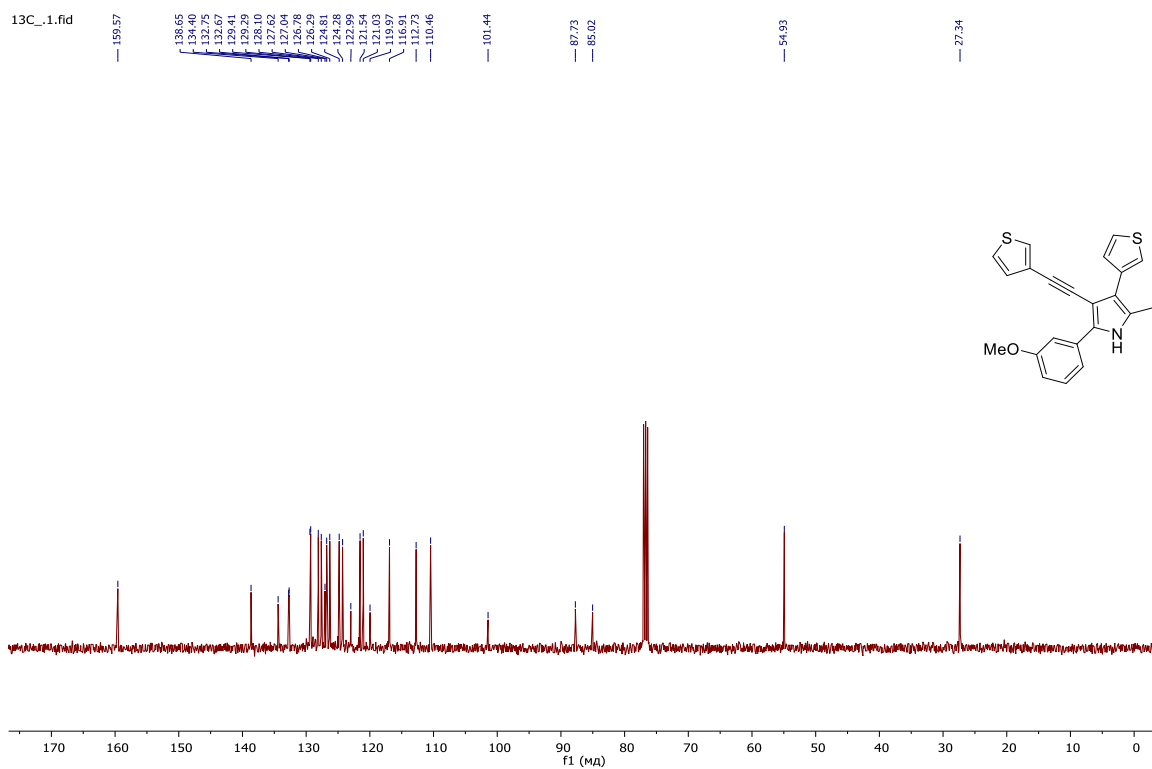

## 2. X-ray diffraction analysis

The structures was solved by direct methods using the SHELXT-2014/5 and refined by full-matrix least-squares method against all F<sup>2</sup> in anisotropic approximation using the SHELXL-2018/3<sup>1</sup>. The hydrogen atoms positions were calculated with the riding model. The hydrogen atom position for NH-groups was located from difference Fourier map. Absorption corrections were applied using the empirical multiscan method with the SADABS program<sup>2</sup>. Compound **3al** is monoclinic, space group P2<sub>1</sub>,  $a = 9.1310(4)$ ,  $b = 8.5709(3)$ ,  $c = 13.8389(5)$  Å,  $\beta = 91.507(2)^\circ$ ,  $V = 1082.67(7)$  Å<sup>3</sup>,  $Z = 2$ , C<sub>29</sub>H<sub>21</sub>NS, formula weight 415.53, crystal density  $D_c = 1.275$  g/cm<sup>3</sup>,  $\mu = 0.166$  mm<sup>-1</sup>,  $F(0\ 0\ 0) = 436$ , yellow crystal size 0.90 x 0.15 x 0.06 mm<sup>3</sup>, independent reflections 4956 ( $R_{int} = 0.0423$ ),  $wR_2 = 0.0756$ , goodness of fit  $S = 1.02$  for all reflections and  $R = 0.0330$  for 4183  $I > 2\sigma$ , absolute structure parameter (Flack parameter) is equal to 0.06(3), difference electron density max is 0.11 and min is -0.12 e<sup>-</sup>/Å<sup>3</sup>. The thiophene cycle is disordered by two positions with 0.767 : 0.233(4) occupation ratio. CCDC 2260734 contain the supplementary crystallographic data for this paper. These data can be obtained free of charge from The Cambridge Crystallographic Data Centre (CCDC) via [www.ccdc.cam.ac.uk/data\\_request/cif](http://www.ccdc.cam.ac.uk/data_request/cif). Molecular structures of compound **3al** is illustrated in Figure 1.

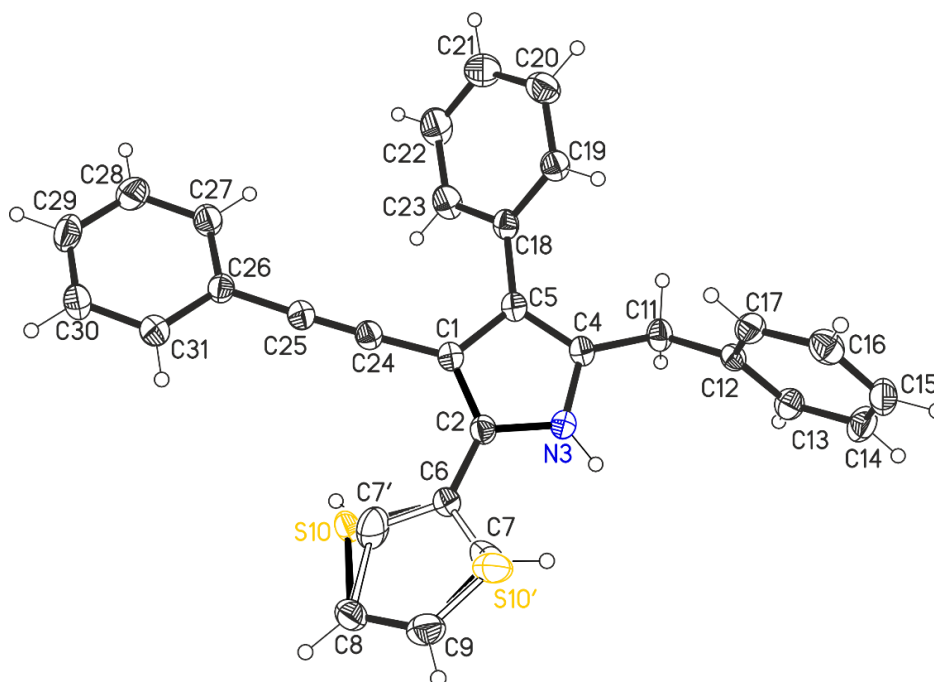

**Figure 1.** Molecular structures and atomic numbering for **3al** (30% thermal ellipsoids are shown).

The obtained crystal structures were analyzed for the geometrical parameters and short contacts between non-bonded atoms using PLATON<sup>3</sup> and MERCURY programs<sup>4</sup>. The

geometric parameters for all compounds agreed within  $3\sigma$  of the corresponding mean statistical values<sup>5</sup>.

According to the of X-ray diffraction data the all cycles are perfectly planar in the crystal. The dihedral angle between 1H-pyrrole cycle and thiophene cycle is equal to  $28.2(2)^\circ$ , the dihedral angle between 1H-pyrrole cycle and phenyl cycle C18 – C 23 is equal to  $48.8(1)^\circ$ , the dihedral angle between phenyl cycle C18 – C 23 and phenyl cycle C12 – C 17 is equal to  $58.3(1)^\circ$ . The shortened S10...H7a 2.82 Å contact lead to formation of 1D chains. Note, that normal S...H contact is 2.92 Å<sup>6</sup>. Additionally to the S...H, the C-H... $\pi$  interaction H-atoms of the C7-H7a and C8-H8a bonds of one molecule with thiophene and phenyl cycles of another are observed, the H-atoms-to-plane distances are from 2.81 to 2.97 Å.

### 3. References

- 
- 1 G. M. Sheldrick, Crystal structure refinement with SHELXL. *Acta Crystallogr., Sect. C: Struct. Chem.*, **2015**, *71*, 3-8.
  - 2 SADABS, v. 2008-1, Bruker AXS, Madison, WI, USA, 2008.
  - 3 (a) A. L. Spek, PLATON-A Multipurpose Crystallographic Tool (Version 10M). Utrecht University, Utrecht, The Netherlands. 2003; (b) A. L. Spek, Single-crystal structure validation with the program PLATON. *J. Appl. Crystallogr.* 2003, **36**, 7-13.
  - 4 C. F. Macrae, P. R. Edgington, P. McCabe, E. Pidcock, G. P. Shields, R. Taylor, M. Towler and J. van de Streek, Mercury: visualization and analysis of crystal structures. *J. Appl. Crystallogr.* 2006, **39**, 453-457.
  - 5 F. H. Allen, O. Kennard, D. G. Watson, L. Brammer, A. G. Orpen and R. Taylor, Tables of bond lengths determined by X-ray and neutron diffraction. Part 1. Bond lengths in organic compounds. *J. Chem. Soc., Perkin Trans., 2*. 1987, S1-S19.
  - 6 R. S. Rowland and R. Taylor, Intermolecular nonbonded contact distances in organic crystal structures: comparison with distances expected from van der Waals radii. *J. Phys. Chem.*, 1996, **100**, 7384-7391.
